# Supplementary material for: Early-Summer Deficit Irrigation Increases the Dry-Matter Content and Enhances the Quality of Ambrosia™ Apples At- and Post-Harvest
Source: MDPI journal article supplement (doi:10.3390/horticulturae8070571), 2022-06-23

# Supplementary Materials: Early-Summer Deficit Irrigation Increases the Dry-Matter Content and Enhances the Quality of Ambrosia™ Apples At- and Post-Harvest

Changwen Lu

**Table S1.** DMC<sup>1</sup> levels and storage period of some common apple cultivars of Canada in cold-air storage\*.

| Cultivars                   | Ambrosia™  | Aurora<br>Golden<br>Gala™ | Royal<br>Gala | Fuji       | Red<br>Delicious | McIntosh   | Honeycrisp |
|-----------------------------|------------|---------------------------|---------------|------------|------------------|------------|------------|
| DMC (%)                     | 13.9 ± 1.0 | 19.0 ± 1.0                | 14.9 ± 0.8    | 18.7 ± 1.1 | 13.5 ± 1.0       | 13.0 ± 0.8 | 15.1 ± 0.8 |
| Storage period <sup>2</sup> | Short      | Very long                 | Middle        | Long       | Short            | Very short | Middle     |

\*All of the dates presented in the table were subject to limited investigation in the experimental plots in 2017 only. The date does not stand for standard criteria, and only stands for comparisons of relative differences amongst the samples in this investigation.

<sup>1</sup>DMC: dry matter content.

<sup>2</sup>The storage period is determined by the flesh firmness having dropped to 12 lbs with an 11-mm punch probe (Hoehn et al. 2003) in the fruit stored in air at 0.5°C based on two different years of investigations with three replications of 20 to 30 fruit. All of the samples of the cultivars were collected from plots under conventional management. The term of the storage period were: very short = 2 months or less; short = 2–3.5 months; middle = 3.5–5 months; long = 6–7 months; very long = over 7 months. The storage periods also referred to the BC Tree Fruit Production Guide (<https://www.bctfpg.ca/horticulture/varieties-and-pollination/apple-varieties>). The DMC was predicted using a Felix F750 handheld spectrometer (Felix Instruments, Inc. Camas, WA, USA).

**Table S2.** Tree survives and fruit yields of Ambrosia™ apple followed by different irrigation in years 2018 and 2019\*

|                                                |      | <b>AI</b>    | <b>ED</b>    | <b>MD</b>   | <b>LD</b>    | <b>DD</b>   |
|------------------------------------------------|------|--------------|--------------|-------------|--------------|-------------|
| Wilting tree (%) <sup>1</sup>                  | 2018 | 0            | 0            | 0           | 5.6 ± 9.6    | 38.9 ± 9.6  |
|                                                | 2019 | 0            | 0            | 0           | 0            | 0           |
| Total weight of fruit per rep (Kg)             | 2018 | 57.2 ± 3.9   | 53.0 ± 4.1   | 50.6 ± 2.7  | 50.5 ± 2.9   | 33.2 ± 3.9  |
|                                                | 2019 | 58.5 ± 2.4   | 57.6 ± 2.6   | 55.6 ± 2.3  | 54.7 ± 2.5   | 52.8 ± 3.0  |
| Number of fruit per rep in 2nd yr <sup>2</sup> | 2018 | 237.7 ± 12.2 | 231.0 ± 13.5 | 243.0 ± 9.8 | 225.7 ± 26.1 | 105.0 ± 9.8 |
|                                                | 2019 | NA           | NA           | NA          | NA           | NA          |

\*Data of Investigation were presented as the mean ± SD (standard deviation) of three replications (6-trees per rep) for each treatment.

Abbreviations in table: AI: adequate irrigation with CI for whole growth season; ED: early-summer DI; MD: middle-summer DI; LD: later summer DI; DD: double period DI, covers the periods MD and LD.

<sup>1</sup>The trees presented wilting leaves and dead shoots were counted in three d prior to harvest in both years.

<sup>2</sup>The subsequent impact of fruit productivity was investigated by counting the numbers of fruit load in middle July of the second year. However, the field investigation on the impact from 2019 was cancelled due to Covid-19 pandemic.

**Table S3. Tukey's test outputs**

| 1way ANOVA - Compare all pair: SS-incidence |  |  |  | 1way ANOVA of Data-Column: SS-incidence |         |        |        |                  |        |        |        |        |        |       |  |
|---------------------------------------------|--|--|--|-----------------------------------------|---------|--------|--------|------------------|--------|--------|--------|--------|--------|-------|--|
| Parameter                                   |  |  |  | 2018AI                                  | 2018ED  | 2018MD | 2018LD | 2018DD           | 2019AI | 2019ED | 2019MD | 2019LD | 2019DD |       |  |
| Table Ana Data 2 SS-incidn                  |  |  |  | Number o                                | 3       | 3      | 3      | 3                | 3      | 3      | 3      | 3      | 3      |       |  |
| One-way analysis of variance                |  |  |  | Minimum                                 | 4.35    | 0      | 21.74  | 26.09            | 56.52  | 5.263  | 4.167  | 4.545  | 4.255  | 37.93 |  |
| P value < 0.0001                            |  |  |  | 25% Perce                               | 4.35    | 0      | 21.74  | 26.09            | 56.52  | 5.263  | 4.167  | 4.545  | 4.255  | 37.93 |  |
| P value s ***                               |  |  |  | Median                                  | 4.35    | 4.35   | 26.09  | 26.09            | 65.22  | 5.556  | 4.545  | 4.878  | 4.545  | 44.44 |  |
| Are mean Yes                                |  |  |  | 75% Perce                               | 8.7     | 4.35   | 26.09  | 30.43            | 69.57  | 6.977  | 5      | 6.25   | 9.756  | 44.74 |  |
| Number 10                                   |  |  |  | Maximum                                 | 8.7     | 4.35   | 26.09  | 30.43            | 69.57  | 6.977  | 5      | 6.25   | 9.756  | 44.74 |  |
| F 133.3                                     |  |  |  | Mean                                    | 5.8     | 2.9    | 24.64  | 27.54            | 63.77  | 5.932  | 4.571  | 5.225  | 6.186  | 42.37 |  |
| R square 0.9836                             |  |  |  | Std. Devia                              | 2.511   | 2.511  | 2.511  | 2.506            | 6.645  | 0.9167 | 0.4172 | 0.9035 | 3.096  | 3.848 |  |
| ANOVA T:SS df MS                            |  |  |  | Std. Error                              | 1.45    | 1.45   | 1.45   | 1.447            | 3.836  | 0.5292 | 0.2409 | 0.5217 | 1.787  | 2.221 |  |
| Treatment 11460 9 1274                      |  |  |  | Lower 95%                               | -0.4388 | -3.339 | 18.4   | 21.31            | 47.26  | 3.655  | 3.534  | 2.98   | -1.504 | 32.81 |  |
| Residual 191.1 20 9.557                     |  |  |  | Upper 95%                               | 12.04   | 9.139  | 30.88  | 33.76            | 80.28  | 8.209  | 5.607  | 7.469  | 13.88  | 51.93 |  |
| Total 11660 29                              |  |  |  |                                         |         |        |        |                  |        |        |        |        |        |       |  |
| Tukey's M Mean Diff q                       |  |  |  | Significan Summary 95% CI of diff       |         |        |        |                  |        |        |        |        |        |       |  |
| 2018AI vs                                   |  |  |  | 2.9                                     | 1.625   | No     | ns     | -6.039 to 11.84  |        |        |        |        |        |       |  |
| 2018AI vs                                   |  |  |  | -18.84                                  | 10.56   | Yes    | ***    | -27.78 to -9.901 |        |        |        |        |        |       |  |
| 2018AI vs                                   |  |  |  | -21.74                                  | 12.18   | Yes    | ***    | -30.68 to -12.80 |        |        |        |        |        |       |  |
| 2018AI vs                                   |  |  |  | -57.97                                  | 32.48   | Yes    | ***    | -66.91 to -49.03 |        |        |        |        |        |       |  |
| 2018AI vs                                   |  |  |  | -0.1318                                 | 0.07385 | No     | ns     | -9.070 to 8.807  |        |        |        |        |        |       |  |
| 2018AI vs                                   |  |  |  | 1.229                                   | 0.6887  | No     | ns     | -7.709 to 10.17  |        |        |        |        |        |       |  |
| 2018AI vs                                   |  |  |  | 0.5755                                  | 0.3224  | No     | ns     | -8.363 to 9.514  |        |        |        |        |        |       |  |
| 2018AI vs                                   |  |  |  | -0.3856                                 | 0.2161  | No     | ns     | -9.324 to 8.553  |        |        |        |        |        |       |  |
| 2018AI vs                                   |  |  |  | -36.57                                  | 20.49   | Yes    | ***    | -45.51 to -27.63 |        |        |        |        |        |       |  |
| 2018ED v                                    |  |  |  | -21.74                                  | 12.18   | Yes    | ***    | -30.68 to -12.80 |        |        |        |        |        |       |  |
| 2018ED v                                    |  |  |  | -24.64                                  | 13.8    | Yes    | ***    | -33.58 to -15.70 |        |        |        |        |        |       |  |
| 2018ED v                                    |  |  |  | -60.87                                  | 34.1    | Yes    | ***    | -69.81 to -51.93 |        |        |        |        |        |       |  |
| 2018ED v                                    |  |  |  | -3.032                                  | 1.699   | No     | ns     | -11.97 to 5.907  |        |        |        |        |        |       |  |
| 2018ED v                                    |  |  |  | -1.671                                  | 0.936   | No     | ns     | -10.61 to 7.268  |        |        |        |        |        |       |  |
| 2018ED v                                    |  |  |  | -2.325                                  | 1.302   | No     | ns     | -11.26 to 6.614  |        |        |        |        |        |       |  |
| 2018ED v                                    |  |  |  | -3.286                                  | 1.841   | No     | ns     | -12.22 to 5.653  |        |        |        |        |        |       |  |
| 2018ED v                                    |  |  |  | -39.47                                  | 22.11   | Yes    | ***    | -48.41 to -30.53 |        |        |        |        |        |       |  |
| 2018MD v                                    |  |  |  | -2.897                                  | 1.623   | No     | ns     | -11.84 to 6.042  |        |        |        |        |        |       |  |
| 2018MD v                                    |  |  |  | -39.13                                  | 21.92   | Yes    | ***    | -48.07 to -30.19 |        |        |        |        |        |       |  |
| 2018MD v                                    |  |  |  | 18.71                                   | 10.48   | Yes    | ***    | 9.770 to 27.65   |        |        |        |        |        |       |  |
| 2018MD v                                    |  |  |  | 20.07                                   | 11.24   | Yes    | ***    | 11.13 to 29.01   |        |        |        |        |        |       |  |
| 2018MD v                                    |  |  |  | 19.42                                   | 10.88   | Yes    | ***    | 10.48 to 28.35   |        |        |        |        |        |       |  |
| 2018MD v                                    |  |  |  | 18.45                                   | 10.34   | Yes    | ***    | 9.516 to 27.39   |        |        |        |        |        |       |  |
| 2018MD v                                    |  |  |  | -17.73                                  | 9.934   | Yes    | ***    | -26.67 to -8.792 |        |        |        |        |        |       |  |
| 2018LD v                                    |  |  |  | -36.23                                  | 20.3    | Yes    | ***    | -45.17 to -27.29 |        |        |        |        |        |       |  |
| 2018LD v                                    |  |  |  | 21.6                                    | 12.1    | Yes    | ***    | 12.67 to 30.54   |        |        |        |        |        |       |  |
| 2018LD v                                    |  |  |  | 22.97                                   | 12.87   | Yes    | ***    | 14.03 to 31.90   |        |        |        |        |        |       |  |
| 2018LD v                                    |  |  |  | 22.31                                   | 12.5    | Yes    | ***    | 13.37 to 31.25   |        |        |        |        |        |       |  |
| 2018LD v                                    |  |  |  | 21.35                                   | 11.96   | Yes    | ***    | 12.41 to 30.29   |        |        |        |        |        |       |  |
| 2018LD v                                    |  |  |  | -14.83                                  | 8.311   | Yes    | ***    | -23.77 to -5.896 |        |        |        |        |        |       |  |
| 2018DD v                                    |  |  |  | 57.84                                   | 32.4    | Yes    | ***    | 48.90 to 66.78   |        |        |        |        |        |       |  |
| 2018DD v                                    |  |  |  | 59.2                                    | 33.17   | Yes    | ***    | 50.26 to 68.14   |        |        |        |        |        |       |  |
| 2018DD v                                    |  |  |  | 58.55                                   | 32.8    | Yes    | ***    | 49.61 to 67.48   |        |        |        |        |        |       |  |
| 2018DD v                                    |  |  |  | 57.58                                   | 32.26   | Yes    | ***    | 48.65 to 66.52   |        |        |        |        |        |       |  |
| 2018DD v                                    |  |  |  | 21.4                                    | 11.99   | Yes    | ***    | 12.46 to 30.34   |        |        |        |        |        |       |  |
| 2019AI vs                                   |  |  |  | 1.361                                   | 0.7626  | No     | ns     | -7.577 to 10.30  |        |        |        |        |        |       |  |
| 2019AI vs                                   |  |  |  | 0.7073                                  | 0.3963  | No     | ns     | -8.231 to 9.646  |        |        |        |        |        |       |  |
| 2019AI vs                                   |  |  |  | -0.2538                                 | 0.1422  | No     | ns     | -9.192 to 8.685  |        |        |        |        |        |       |  |
| 2019AI vs                                   |  |  |  | -36.44                                  | 20.42   | Yes    | ***    | -45.38 to -27.50 |        |        |        |        |        |       |  |
| 2019ED v                                    |  |  |  | -0.6538                                 | 0.3663  | No     | ns     | -9.592 to 8.285  |        |        |        |        |        |       |  |
| 2019ED v                                    |  |  |  | -1.615                                  | 0.9048  | No     | ns     | -10.55 to 7.324  |        |        |        |        |        |       |  |
| 2019ED v                                    |  |  |  | -37.8                                   | 21.18   | Yes    | ***    | -46.74 to -28.86 |        |        |        |        |        |       |  |
| 2019MD v                                    |  |  |  | -0.9611                                 | 0.5385  | No     | ns     | -9.900 to 7.977  |        |        |        |        |        |       |  |
| 2019MD v                                    |  |  |  | -37.15                                  | 20.81   | Yes    | ***    | -46.08 to -28.21 |        |        |        |        |        |       |  |
| 2019LD v                                    |  |  |  | -36.19                                  | 20.27   | Yes    | ***    | -45.12 to -27.25 |        |        |        |        |        |       |  |

Tukey

Significance Level: 0.05

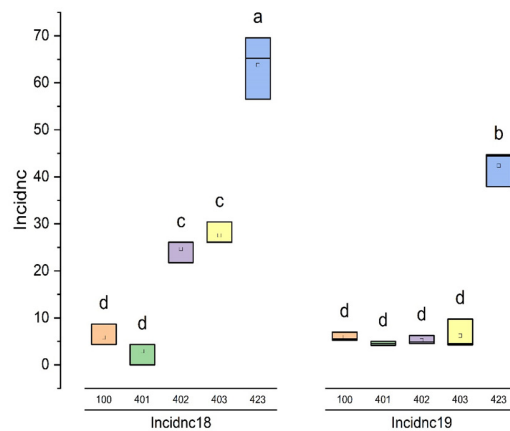

Tukey  
Significance Level: 0.05

**Table S3. Tukey's test outputs**

| 1way ANOVA - Compare all pair: SS-severity |                    |         |          |     | 1way ANOVA of Data-Column: SS-severity |             |          |         |         |                |          |          |          |         |         |  |  |
|--------------------------------------------|--------------------|---------|----------|-----|----------------------------------------|-------------|----------|---------|---------|----------------|----------|----------|----------|---------|---------|--|--|
| Parameter                                  |                    |         |          |     | 2018AI                                 | 2018ED      | 2018MD   | 2018LD  | 2018DD  | 2019AI         | 2019ED   | 2019MD   | 2019LD   | 2019DD  |         |  |  |
| Table Analyzed                             | Data 2 SS-severity |         |          |     | Number o                               | 3           | 3        | 3       | 3       | 3              | 3        | 3        | 3        | 3       |         |  |  |
| One-way analysis of variance               |                    |         |          |     | Minimum                                | 0.04348     | 0        | 0.2609  | 0.3043  | 1.087          | 0.08333  | 0.04545  | 0.06818  | 0.08511 | 0.5     |  |  |
| P value                                    | < 0.0001           |         |          |     | 25% Perce                              | 0.04348     | 0        | 0.2609  | 0.3043  | 1.087          | 0.08333  | 0.04545  | 0.06818  | 0.08511 | 0.5     |  |  |
| P value summary                            | ***                |         |          |     | Median                                 | 0.04348     | 0.04348  | 0.3478  | 0.3913  | 1.13           | 0.09302  | 0.0625   | 0.08333  | 0.09091 | 0.6111  |  |  |
| Are means signif. different? (P < 0.05)    |                    |         |          |     | 75% Perce                              | 0.08696     | 0.04348  | 0.3913  | 0.3913  | 1.26           | 0.1053   | 0.075    | 0.09756  | 0.1463  | 0.7368  |  |  |
| Number of groups                           | 10                 |         |          |     | Maximum                                | 0.08696     | 0.04348  | 0.3913  | 0.3913  | 1.26           | 0.1053   | 0.075    | 0.09756  | 0.1463  | 0.7368  |  |  |
| F                                          | 120.5              |         |          |     |                                        |             |          |         |         |                |          |          |          |         |         |  |  |
| R squared                                  | 0.9819             |         |          |     | Mean                                   | 0.05797     | 0.02899  | 0.3333  | 0.3623  | 1.159          | 0.09387  | 0.06098  | 0.08303  | 0.1075  | 0.616   |  |  |
|                                            |                    |         |          |     | Std. Devia                             | 0.0251      | 0.0251   | 0.06641 | 0.0502  | 0.09002        | 0.01099  | 0.01483  | 0.01469  | 0.0338  | 0.1185  |  |  |
| ANOVA Table                                | SS                 | df      | MS       |     | Std. Error                             | 0.01449     | 0.01449  | 0.03834 | 0.02899 | 0.05197        | 0.006345 | 0.008563 | 0.008482 | 0.01952 | 0.06841 |  |  |
| Treatment (between columns)                | 3.473              | 9       | 0.3859   |     |                                        |             |          |         |         |                |          |          |          |         |         |  |  |
| Residual (within columns)                  | 0.06407            | 20      | 0.003204 |     | Lower 95%                              | -0.00439    | -0.03337 | 0.1684  | 0.2376  | 0.9355         | 0.06657  | 0.02414  | 0.04653  | 0.02348 | 0.3216  |  |  |
| Total                                      | 3.537              | 29      |          |     | Upper 95%                              | 0.1203      | 0.09134  | 0.4983  | 0.487   | 1.383          | 0.1212   | 0.09783  | 0.1195   | 0.1914  | 0.9103  |  |  |
| Tukey's Multiple Comparison Test           |                    |         |          |     | Mean Diff q                            | Significant |          | Summary |         | 95% CI of diff |          |          |          |         |         |  |  |
| 2018AI vs 2018ED                           | 0.02899            | 0.887   | No       | ns  | -0.1347 to 0.1926                      |             |          |         |         |                |          |          |          |         |         |  |  |
| 2018AI vs 2018MD                           | -0.2754            | 8.427   | Yes      | *** | -0.4390 to -0.1117                     |             |          |         |         |                |          |          |          |         |         |  |  |
| 2018AI vs 2018LD                           | -0.3043            | 9.314   | Yes      | *** | -0.4680 to -0.1407                     |             |          |         |         |                |          |          |          |         |         |  |  |
| 2018AI vs 2018DD                           | -1.101             | 33.7    | Yes      | *** | -1.265 to -0.9375                      |             |          |         |         |                |          |          |          |         |         |  |  |
| 2018AI vs 2019AI                           | -0.0359            | 1.099   | No       | ns  | -0.1996 to 0.1277                      |             |          |         |         |                |          |          |          |         |         |  |  |
| 2018AI vs 2019ED                           | -0.00301           | 0.09223 | No       | ns  | -0.1667 to 0.1606                      |             |          |         |         |                |          |          |          |         |         |  |  |
| 2018AI vs 2019MD                           | -0.02505           | 0.7667  | No       | ns  | -0.1887 to 0.1386                      |             |          |         |         |                |          |          |          |         |         |  |  |
| 2018AI vs 2019LD                           | -0.04948           | 1.514   | No       | ns  | -0.2131 to 0.1142                      |             |          |         |         |                |          |          |          |         |         |  |  |
| 2018AI vs 2019DD                           | -0.558             | 17.08   | Yes      | *** | -0.7217 to -0.3944                     |             |          |         |         |                |          |          |          |         |         |  |  |
| 2018ED vs 2018MD                           | -0.3043            | 9.314   | Yes      | *** | -0.4680 to -0.1407                     |             |          |         |         |                |          |          |          |         |         |  |  |
| 2018ED vs 2018LD                           | -0.3333            | 10.2    | Yes      | *** | -0.4970 to -0.1697                     |             |          |         |         |                |          |          |          |         |         |  |  |
| 2018ED vs 2018DD                           | -1.13              | 34.58   | Yes      | *** | -1.294 to -0.9665                      |             |          |         |         |                |          |          |          |         |         |  |  |
| 2018ED vs 2019AI                           | -0.06489           | 1.986   | No       | ns  | -0.2285 to 0.09876                     |             |          |         |         |                |          |          |          |         |         |  |  |
| 2018ED vs 2019ED                           | -0.032             | 0.9792  | No       | ns  | -0.1957 to 0.1317                      |             |          |         |         |                |          |          |          |         |         |  |  |
| 2018ED vs 2019MD                           | -0.05404           | 1.654   | No       | ns  | -0.2177 to 0.1096                      |             |          |         |         |                |          |          |          |         |         |  |  |
| 2018ED vs 2019LD                           | -0.07847           | 2.401   | No       | ns  | -0.2421 to 0.08519                     |             |          |         |         |                |          |          |          |         |         |  |  |
| 2018ED vs 2019DD                           | -0.587             | 17.96   | Yes      | *** | -0.7507 to -0.4233                     |             |          |         |         |                |          |          |          |         |         |  |  |
| 2018MD vs 2018LD                           | -0.02899           | 0.887   | No       | ns  | -0.1926 to 0.1347                      |             |          |         |         |                |          |          |          |         |         |  |  |
| 2018MD vs 2018DD                           | -0.8258            | 25.27   | Yes      | *** | -0.9894 to -0.6621                     |             |          |         |         |                |          |          |          |         |         |  |  |
| 2018MD vs 2019AI                           | 0.2395             | 7.328   | Yes      | **  | 0.07581 to 0.4031                      |             |          |         |         |                |          |          |          |         |         |  |  |
| 2018MD vs 2019ED                           | 0.2723             | 8.334   | Yes      | *** | 0.1087 to 0.4360                       |             |          |         |         |                |          |          |          |         |         |  |  |
| 2018MD vs 2019MD                           | 0.2503             | 7.66    | Yes      | *** | 0.08666 to 0.4140                      |             |          |         |         |                |          |          |          |         |         |  |  |
| 2018MD vs 2019LD                           | 0.2259             | 6.912   | Yes      | **  | 0.06223 to 0.3895                      |             |          |         |         |                |          |          |          |         |         |  |  |
| 2018MD vs 2019DD                           | -0.2827            | 8.65    | Yes      | *** | -0.4463 to -0.1190                     |             |          |         |         |                |          |          |          |         |         |  |  |
| 2018LD vs 2018DD                           | -0.7968            | 24.38   | Yes      | *** | -0.9605 to -0.6332                     |             |          |         |         |                |          |          |          |         |         |  |  |
| 2018LD vs 2019AI                           | 0.2684             | 8.215   | Yes      | *** | 0.1048 to 0.4321                       |             |          |         |         |                |          |          |          |         |         |  |  |
| 2018LD vs 2019ED                           | 0.3013             | 9.221   | Yes      | *** | 0.1377 to 0.4650                       |             |          |         |         |                |          |          |          |         |         |  |  |
| 2018LD vs 2019MD                           | 0.2793             | 8.547   | Yes      | *** | 0.1156 to 0.4429                       |             |          |         |         |                |          |          |          |         |         |  |  |
| 2018LD vs 2019LD                           | 0.2549             | 7.799   | Yes      | *** | 0.09121 to 0.4185                      |             |          |         |         |                |          |          |          |         |         |  |  |
| 2018LD vs 2019DD                           | -0.2537            | 7.763   | Yes      | *** | -0.4173 to -0.09001                    |             |          |         |         |                |          |          |          |         |         |  |  |
| 2018DD vs 2019AI                           | 1.065              | 32.6    | Yes      | *** | 0.9016 to 1.229                        |             |          |         |         |                |          |          |          |         |         |  |  |
| 2018DD vs 2019ED                           | 1.098              | 33.6    | Yes      | *** | 0.9345 to 1.262                        |             |          |         |         |                |          |          |          |         |         |  |  |
| 2018DD vs 2019MD                           | 1.076              | 32.93   | Yes      | *** | 0.9125 to 1.240                        |             |          |         |         |                |          |          |          |         |         |  |  |
| 2018DD vs 2019LD                           | 1.052              | 32.18   | Yes      | *** | 0.8880 to 1.215                        |             |          |         |         |                |          |          |          |         |         |  |  |
| 2018DD vs 2019DD                           | 0.5431             | 16.62   | Yes      | *** | 0.3795 to 0.7068                       |             |          |         |         |                |          |          |          |         |         |  |  |
| 2019AI vs 2019ED                           | 0.03289            | 1.006   | No       | ns  | -0.1308 to 0.1965                      |             |          |         |         |                |          |          |          |         |         |  |  |
| 2019AI vs 2019MD                           | 0.01085            | 0.332   | No       | ns  | -0.1528 to 0.1745                      |             |          |         |         |                |          |          |          |         |         |  |  |
| 2019AI vs 2019LD                           | -0.01358           | 0.4155  | No       | ns  | -0.1772 to 0.1501                      |             |          |         |         |                |          |          |          |         |         |  |  |
| 2019AI vs 2019DD                           | -0.5221            | 15.98   | Yes      | *** | -0.6858 to -0.3585                     |             |          |         |         |                |          |          |          |         |         |  |  |
| 2019ED vs 2019MD                           | -0.02204           | 0.6745  | No       | ns  | -0.1857 to 0.1416                      |             |          |         |         |                |          |          |          |         |         |  |  |
| 2019ED vs 2019LD                           | -0.04647           | 1.422   | No       | ns  | -0.2101 to 0.1172                      |             |          |         |         |                |          |          |          |         |         |  |  |
| 2019ED vs 2019DD                           | -0.555             | 16.98   | Yes      | *** | -0.7187 to -0.3913                     |             |          |         |         |                |          |          |          |         |         |  |  |
| 2019MD vs 2019LD                           | -0.02443           | 0.7475  | No       | ns  | -0.1881 to 0.1392                      |             |          |         |         |                |          |          |          |         |         |  |  |
| 2019MD vs 2019DD                           | -0.533             | 16.31   | Yes      | *** | -0.6966 to -0.3693                     |             |          |         |         |                |          |          |          |         |         |  |  |
| 2019LD vs 2019DD                           | -0.5085            | 15.56   | Yes      | *** | -0.6722 to -0.3449                     |             |          |         |         |                |          |          |          |         |         |  |  |

**Tukey**  
Significance Level: 0.05

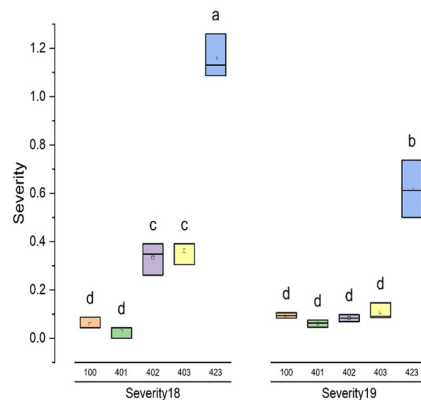

Tukey  
Significance Level: 0.05

**Table S3. Tukey's test outputs**

| 1way ANOVA - Compare all pair: a        |             |                       |         | 1way ANOVA of Data-Column: a |        |        |        |        |        |        |        |        |        |       |  |
|-----------------------------------------|-------------|-----------------------|---------|------------------------------|--------|--------|--------|--------|--------|--------|--------|--------|--------|-------|--|
| Parameter                               |             |                       |         | 2018AI                       | 2018ED | 2018MD | 2018LD | 2018DD | 2019AI | 2019ED | 2019MD | 2019LD | 2019DD |       |  |
| Table Analyzed                          | Colour-a    |                       |         | Number o                     | 6      | 6      | 6      | 6      | 6      | 6      | 6      | 6      | 6      |       |  |
| One-way analysis of variance            |             |                       |         | Minimum                      | 41.16  | 37.64  | 37.55  | 28.32  | 22.84  | 32.78  | 38.56  | 34.53  | 27.62  | 31.82 |  |
| P value                                 | < 0.0001    |                       |         | 25% Perce                    | 41.17  | 38.96  | 39.34  | 28.97  | 26.11  | 36.08  | 38.6   | 35.46  | 28.81  | 32.97 |  |
| P value summary                         | ***         |                       |         | Median                       | 41.85  | 40.48  | 40.53  | 30.75  | 27.97  | 37.29  | 39.11  | 36.83  | 30.97  | 34.99 |  |
| Are means signif. different? (P < 0.)   | Yes         |                       |         | 75% Perce                    | 43.33  | 41.37  | 40.8   | 32.5   | 31.13  | 38.17  | 41.01  | 38.69  | 33.07  | 37.46 |  |
| Number of groups                        | 10          |                       |         | Maximum                      | 44.47  | 42.27  | 40.94  | 33.56  | 31.58  | 39.09  | 41.21  | 39.59  | 34.12  | 38.94 |  |
| F                                       | 32.58       |                       |         | Mean                         | 42.24  | 40.22  | 40.04  | 30.79  | 28.09  | 36.91  | 39.59  | 36.99  | 30.94  | 35.18 |  |
| R squared                               | 0.8543      |                       |         | Std. Devia                   | 1.28   | 1.577  | 1.27   | 2.103  | 3.161  | 2.148  | 1.213  | 1.814  | 2.339  | 2.585 |  |
| Bartlett's test for equal variances     |             |                       |         | Std. Error                   | 0.5227 | 0.6438 | 0.5186 | 0.8584 | 1.291  | 0.8769 | 0.4951 | 0.7404 | 0.955  | 1.055 |  |
| Bartlett's statistic (corrected)        | 8.844       |                       |         | Lower 95%                    | 40.9   | 38.57  | 38.7   | 28.58  | 24.77  | 34.66  | 38.32  | 35.09  | 28.48  | 32.46 |  |
| P value                                 | 0.4518      |                       |         | Upper 95%                    | 43.59  | 41.87  | 41.37  | 32.99  | 31.41  | 39.17  | 40.86  | 38.89  | 33.39  | 37.89 |  |
| P value summary                         | ns          |                       |         |                              |        |        |        |        |        |        |        |        |        |       |  |
| Do the variances differ signif. (P < 0) | No          |                       |         |                              |        |        |        |        |        |        |        |        |        |       |  |
| ANOVA Table                             | SS          | df                    | MS      |                              |        |        |        |        |        |        |        |        |        |       |  |
| Treatment (between columns)             | 1222        | 9                     | 135.8   |                              |        |        |        |        |        |        |        |        |        |       |  |
| Residual (within columns)               | 208.4       | 50                    | 4.168   |                              |        |        |        |        |        |        |        |        |        |       |  |
| Total                                   | 1431        | 59                    |         |                              |        |        |        |        |        |        |        |        |        |       |  |
| Tukey's Multiple Comparison Test        | Mean Diff q | Significant? P < 0.05 | Summary | 95% CI of diff               |        |        |        |        |        |        |        |        |        |       |  |
| 2018AI vs 2018ED                        | 2.023       | 2.427 No              | ns      | -1.887 to 5.932              |        |        |        |        |        |        |        |        |        |       |  |
| 2018AI vs 2018MD                        | 2.205       | 2.645 No              | ns      | -1.705 to 6.114              |        |        |        |        |        |        |        |        |        |       |  |
| 2018AI vs 2018LD                        | 11.46       | 13.74 Yes             | ***     | 7.547 to 15.37               |        |        |        |        |        |        |        |        |        |       |  |
| 2018AI vs 2018DD                        | 14.15       | 16.98 Yes             | ***     | 10.24 to 18.06               |        |        |        |        |        |        |        |        |        |       |  |
| 2018AI vs 2019AI                        | 5.329       | 6.394 Yes             | **      | 1.420 to 9.239               |        |        |        |        |        |        |        |        |        |       |  |
| 2018AI vs 2019ED                        | 2.654       | 3.185 No              | ns      | -1.255 to 6.564              |        |        |        |        |        |        |        |        |        |       |  |
| 2018AI vs 2019MD                        | 5.254       | 6.304 Yes             | **      | 1.345 to 9.164               |        |        |        |        |        |        |        |        |        |       |  |
| 2018AI vs 2019LD                        | 11.31       | 13.57 Yes             | ***     | 7.398 to 15.22               |        |        |        |        |        |        |        |        |        |       |  |
| 2018AI vs 2019DD                        | 7.068       | 8.48 Yes              | ***     | 3.158 to 10.98               |        |        |        |        |        |        |        |        |        |       |  |
| 2018ED vs 2018MD                        | 0.182       | 0.2184 No             | ns      | -3.727 to 4.091              |        |        |        |        |        |        |        |        |        |       |  |
| 2018ED vs 2018LD                        | 9.433       | 11.32 Yes             | ***     | 5.524 to 13.34               |        |        |        |        |        |        |        |        |        |       |  |
| 2018ED vs 2018DD                        | 12.13       | 14.55 Yes             | ***     | 8.219 to 16.04               |        |        |        |        |        |        |        |        |        |       |  |
| 2018ED vs 2019AI                        | 3.307       | 3.967 No              | ns      | -0.6028 to 7.216             |        |        |        |        |        |        |        |        |        |       |  |
| 2018ED vs 2019ED                        | 0.6317      | 0.7579 No             | ns      | -3.278 to 4.541              |        |        |        |        |        |        |        |        |        |       |  |
| 2018ED vs 2019MD                        | 3.232       | 3.877 No              | ns      | -0.6778 to 7.141             |        |        |        |        |        |        |        |        |        |       |  |
| 2018ED vs 2019LD                        | 9.285       | 11.14 Yes             | ***     | 5.376 to 13.19               |        |        |        |        |        |        |        |        |        |       |  |
| 2018ED vs 2019DD                        | 5.045       | 6.053 Yes             | **      | 1.136 to 8.954               |        |        |        |        |        |        |        |        |        |       |  |
| 2018MD vs 2018LD                        | 9.251       | 11.1 Yes              | ***     | 5.342 to 13.16               |        |        |        |        |        |        |        |        |        |       |  |
| 2018MD vs 2018DD                        | 11.95       | 14.33 Yes             | ***     | 8.037 to 15.86               |        |        |        |        |        |        |        |        |        |       |  |
| 2018MD vs 2019AI                        | 3.125       | 3.749 No              | ns      | -0.7848 to 7.034             |        |        |        |        |        |        |        |        |        |       |  |
| 2018MD vs 2019ED                        | 0.4497      | 0.5395 No             | ns      | -3.460 to 4.359              |        |        |        |        |        |        |        |        |        |       |  |
| 2018MD vs 2019MD                        | 3.05        | 3.659 No              | ns      | -0.8598 to 6.959             |        |        |        |        |        |        |        |        |        |       |  |
| 2018MD vs 2019LD                        | 9.103       | 10.92 Yes             | ***     | 5.194 to 13.01               |        |        |        |        |        |        |        |        |        |       |  |
| 2018MD vs 2019DD                        | 4.863       | 5.835 Yes             | **      | 0.9535 to 8.772              |        |        |        |        |        |        |        |        |        |       |  |
| 2018LD vs 2018DD                        | 2.695       | 3.233 No              | ns      | -1.215 to 6.604              |        |        |        |        |        |        |        |        |        |       |  |
| 2018LD vs 2019AI                        | -6.127      | 7.351 Yes             | ***     | -10.04 to -2.217             |        |        |        |        |        |        |        |        |        |       |  |
| 2018LD vs 2019ED                        | -8.802      | 10.56 Yes             | ***     | -12.71 to -4.892             |        |        |        |        |        |        |        |        |        |       |  |
| 2018LD vs 2019MD                        | -6.202      | 7.441 Yes             | ***     | -10.11 to -2.292             |        |        |        |        |        |        |        |        |        |       |  |
| 2018LD vs 2019LD                        | -0.1483     | 0.178 No              | ns      | -4.058 to 3.761              |        |        |        |        |        |        |        |        |        |       |  |
| 2018LD vs 2019DD                        | -4.388      | 5.265 Yes             | *       | -8.298 to -0.4789            |        |        |        |        |        |        |        |        |        |       |  |
| 2018DD vs 2019AI                        | -8.821      | 10.58 Yes             | ***     | -12.73 to -4.912             |        |        |        |        |        |        |        |        |        |       |  |
| 2018DD vs 2019ED                        | -11.5       | 13.79 Yes             | ***     | -15.41 to -7.587             |        |        |        |        |        |        |        |        |        |       |  |
| 2018DD vs 2019MD                        | -8.896      | 10.67 Yes             | ***     | -12.81 to -4.987             |        |        |        |        |        |        |        |        |        |       |  |
| 2018DD vs 2019LD                        | -2.843      | 3.411 No              | ns      | -6.752 to 1.066              |        |        |        |        |        |        |        |        |        |       |  |
| 2018DD vs 2019DD                        | -7.083      | 8.498 Yes             | ***     | -10.99 to -3.174             |        |        |        |        |        |        |        |        |        |       |  |
| 2019AI vs 2019ED                        | -2.675      | 3.209 No              | ns      | -6.584 to 1.234              |        |        |        |        |        |        |        |        |        |       |  |
| 2019AI vs 2019MD                        | -0.075      | 0.08998 No            | ns      | -3.984 to 3.834              |        |        |        |        |        |        |        |        |        |       |  |
| 2019AI vs 2019LD                        | 5.978       | 7.173 Yes             | ***     | 2.069 to 9.888               |        |        |        |        |        |        |        |        |        |       |  |
| 2019AI vs 2019DD                        | 1.738       | 2.086 No              | ns      | -2.171 to 5.648              |        |        |        |        |        |        |        |        |        |       |  |
| 2019ED vs 2019MD                        | 2.6         | 3.119 No              | ns      | -1.309 to 6.509              |        |        |        |        |        |        |        |        |        |       |  |
| 2019ED vs 2019LD                        | 8.653       | 10.38 Yes             | ***     | 4.744 to 12.56               |        |        |        |        |        |        |        |        |        |       |  |
| 2019ED vs 2019DD                        | 4.413       | 5.295 Yes             | *       | 0.5039 to 8.323              |        |        |        |        |        |        |        |        |        |       |  |
| 2019MD vs 2019LD                        | 6.053       | 7.263 Yes             | ***     | 2.144 to 9.963               |        |        |        |        |        |        |        |        |        |       |  |
| 2019MD vs 2019DD                        | 1.813       | 2.176 No              | ns      | -2.096 to 5.723              |        |        |        |        |        |        |        |        |        |       |  |
| 2019LD vs 2019DD                        | -4.24       | 5.087 Yes             | *       | -8.149 to -0.3305            |        |        |        |        |        |        |        |        |        |       |  |

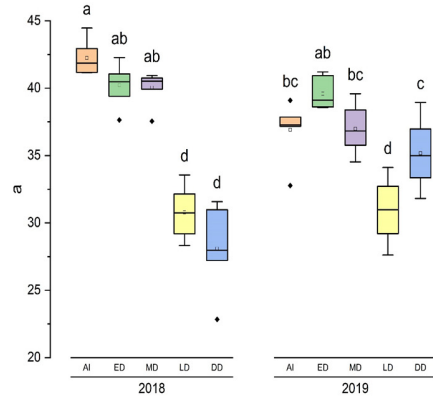

Tukey  
Significance Level: 0.05

**Table S3. Tukey's test outputs**

| 1way ANOVA - Compare all pair: BCI         |           |        |                       |         | 1way ANOVA of Data-Column: BCI |        |        |        |        |        |        |        |        |        |        |
|--------------------------------------------|-----------|--------|-----------------------|---------|--------------------------------|--------|--------|--------|--------|--------|--------|--------|--------|--------|--------|
| Parameter                                  |           |        |                       |         | 2018AI                         | 2018ED | 2018MD | 2018LD | 2018DD | 2019AI | 2019ED | 2019MD | 2019LD | 2019DD |        |
| Table Analyzed                             | Color-BCI |        |                       |         | Number o                       | 6      | 6      | 6      | 6      | 6      | 6      | 6      | 6      | 6      | 6      |
| One-way analysis of variance               |           |        |                       |         | Minimum                        | 38.21  | 38.63  | 33.03  | 30.52  | 20.29  | 32.38  | 40.22  | 33.39  | 28.46  | 31.65  |
| P value                                    | < 0.0001  |        |                       |         | 25% Perce                      | 40.87  | 39.32  | 37.78  | 31.08  | 24.33  | 35.65  | 40.28  | 35.66  | 29.24  | 33.23  |
| P value summary                            | ***       |        |                       |         | Median                         | 44.77  | 43.07  | 42.34  | 32.72  | 28.32  | 39.73  | 41.18  | 36.85  | 30.85  | 35.98  |
| Are means signif. different? (P < 0.05)    | Yes       |        |                       |         | 75% Perce                      | 47.32  | 45.52  | 45.92  | 37.4   | 32.19  | 40.02  | 41.88  | 41.93  | 33.14  | 37.4   |
| Number of groups                           | 10        |        |                       |         | Maximum                        | 48.69  | 46.5   | 45.96  | 38.75  | 33.51  | 40.5   | 42.76  | 42.96  | 36.99  | 38.02  |
| F                                          | 13.4      |        |                       |         | Mean                           | 44.18  | 42.67  | 41.49  | 33.82  | 27.98  | 38.16  | 41.2   | 38.01  | 31.42  | 35.43  |
| R squared                                  | 0.7069    |        |                       |         | Std. Devia                     | 3.84   | 3.094  | 4.951  | 3.409  | 4.914  | 3.122  | 0.9401 | 3.581  | 3.021  | 2.396  |
| Bartlett's test for equal variances        |           |        |                       |         | Std. Error                     | 1.568  | 1.263  | 2.021  | 1.392  | 2.006  | 1.275  | 0.3838 | 1.462  | 1.233  | 0.9782 |
| Bartlett's statistic (corrected)           | 12.3      |        |                       |         | Lower 95%                      | 40.15  | 39.42  | 36.3   | 30.24  | 22.82  | 34.88  | 40.22  | 34.25  | 28.25  | 32.91  |
| P value                                    | 0.197     |        |                       |         | Upper 95%                      | 48.21  | 45.92  | 46.69  | 37.4   | 33.14  | 41.43  | 42.19  | 41.76  | 34.59  | 37.94  |
| P value summary                            | ns        |        |                       |         |                                |        |        |        |        |        |        |        |        |        |        |
| Do the variances differ signif. (P < 0.05) | No        |        |                       |         |                                |        |        |        |        |        |        |        |        |        |        |
| ANOVA Table                                | SS        | df     | MS                    |         |                                |        |        |        |        |        |        |        |        |        |        |
| Treatment (between columns)                | 1483      | 9      | 164.7                 |         |                                |        |        |        |        |        |        |        |        |        |        |
| Residual (within columns)                  | 614.6     | 50     | 12.29                 |         |                                |        |        |        |        |        |        |        |        |        |        |
| Total                                      | 2097      | 59     |                       |         |                                |        |        |        |        |        |        |        |        |        |        |
| Tukey's Multiple Comparison Test           | Mean Diff | q      | Significant? P < 0.05 | Summary | 95% CI of diff                 |        |        |        |        |        |        |        |        |        |        |
| 2018AI vs 2018ED                           | 1.507     | 1.053  | No                    | ns      | -5.206 to 8.221                |        |        |        |        |        |        |        |        |        |        |
| 2018AI vs 2018MD                           | 2.684     | 1.875  | No                    | ns      | -4.030 to 9.397                |        |        |        |        |        |        |        |        |        |        |
| 2018AI vs 2018LD                           | 10.36     | 7.236  | Yes                   | ***     | 3.644 to 17.07                 |        |        |        |        |        |        |        |        |        |        |
| 2018AI vs 2018DD                           | 16.2      | 11.32  | Yes                   | ***     | 9.484 to 22.91                 |        |        |        |        |        |        |        |        |        |        |
| 2018AI vs 2019AI                           | 6.019     | 4.205  | No                    | ns      | -0.6945 to 12.73               |        |        |        |        |        |        |        |        |        |        |
| 2018AI vs 2019ED                           | 2.972     | 2.077  | No                    | ns      | -3.741 to 9.686                |        |        |        |        |        |        |        |        |        |        |
| 2018AI vs 2019MD                           | 6.171     | 4.311  | No                    | ns      | -0.5428 to 12.88               |        |        |        |        |        |        |        |        |        |        |
| 2018AI vs 2019LD                           | 12.76     | 8.914  | Yes                   | ***     | 6.045 to 19.47                 |        |        |        |        |        |        |        |        |        |        |
| 2018AI vs 2019DD                           | 8.747     | 6.111  | Yes                   | **      | 2.034 to 15.46                 |        |        |        |        |        |        |        |        |        |        |
| 2018ED vs 2018MD                           | 1.176     | 0.8218 | No                    | ns      | -5.537 to 7.890                |        |        |        |        |        |        |        |        |        |        |
| 2018ED vs 2018LD                           | 8.85      | 6.183  | Yes                   | **      | 2.137 to 15.56                 |        |        |        |        |        |        |        |        |        |        |
| 2018ED vs 2018DD                           | 14.69     | 10.26  | Yes                   | ***     | 7.976 to 21.40                 |        |        |        |        |        |        |        |        |        |        |
| 2018ED vs 2019AI                           | 4.512     | 3.152  | No                    | ns      | -2.202 to 11.23                |        |        |        |        |        |        |        |        |        |        |
| 2018ED vs 2019ED                           | 1.465     | 1.024  | No                    | ns      | -5.248 to 8.179                |        |        |        |        |        |        |        |        |        |        |
| 2018ED vs 2019MD                           | 4.663     | 3.258  | No                    | ns      | -2.050 to 11.38                |        |        |        |        |        |        |        |        |        |        |
| 2018ED vs 2019LD                           | 11.25     | 7.861  | Yes                   | ***     | 4.538 to 17.97                 |        |        |        |        |        |        |        |        |        |        |
| 2018ED vs 2019DD                           | 7.24      | 5.058  | Yes                   | *       | 0.5265 to 13.95                |        |        |        |        |        |        |        |        |        |        |
| 2018MD vs 2018LD                           | 7.674     | 5.361  | Yes                   | *       | 0.9603 to 14.39                |        |        |        |        |        |        |        |        |        |        |
| 2018MD vs 2018DD                           | 13.51     | 9.441  | Yes                   | ***     | 6.800 to 20.23                 |        |        |        |        |        |        |        |        |        |        |
| 2018MD vs 2019AI                           | 3.336     | 2.33   | No                    | ns      | -3.378 to 10.05                |        |        |        |        |        |        |        |        |        |        |
| 2018MD vs 2019ED                           | 0.2889    | 0.2018 | No                    | ns      | -6.425 to 7.002                |        |        |        |        |        |        |        |        |        |        |
| 2018MD vs 2019MD                           | 3.487     | 2.436  | No                    | ns      | -3.226 to 10.20                |        |        |        |        |        |        |        |        |        |        |
| 2018MD vs 2019LD                           | 10.08     | 7.039  | Yes                   | ***     | 3.362 to 16.79                 |        |        |        |        |        |        |        |        |        |        |
| 2018MD vs 2019DD                           | 6.064     | 4.237  | No                    | ns      | -0.6497 to 12.78               |        |        |        |        |        |        |        |        |        |        |
| 2018LD vs 2018DD                           | 5.84      | 4.08   | No                    | ns      | -0.8737 to 12.55               |        |        |        |        |        |        |        |        |        |        |
| 2018LD vs 2019AI                           | -4.338    | 3.031  | No                    | ns      | -11.05 to 2.375                |        |        |        |        |        |        |        |        |        |        |
| 2018LD vs 2019ED                           | -7.385    | 5.16   | Yes                   | *       | -14.10 to -0.6714              |        |        |        |        |        |        |        |        |        |        |
| 2018LD vs 2019MD                           | -4.187    | 2.925  | No                    | ns      | -10.90 to 2.527                |        |        |        |        |        |        |        |        |        |        |
| 2018LD vs 2019LD                           | 2.402     | 1.678  | No                    | ns      | -4.312 to 9.115                |        |        |        |        |        |        |        |        |        |        |
| 2018LD vs 2019DD                           | -1.61     | 1.125  | No                    | ns      | -8.324 to 5.104                |        |        |        |        |        |        |        |        |        |        |
| 2018DD vs 2019AI                           | -10.18    | 7.111  | Yes                   | ***     | -16.89 to -3.465               |        |        |        |        |        |        |        |        |        |        |
| 2018DD vs 2019ED                           | -13.22    | 9.24   | Yes                   | ***     | -19.94 to -6.511               |        |        |        |        |        |        |        |        |        |        |
| 2018DD vs 2019MD                           | -10.03    | 7.005  | Yes                   | ***     | -16.74 to -3.313               |        |        |        |        |        |        |        |        |        |        |
| 2018DD vs 2019LD                           | -3.438    | 2.402  | No                    | ns      | -10.15 to 3.275                |        |        |        |        |        |        |        |        |        |        |
| 2018DD vs 2019DD                           | -7.45     | 5.205  | Yes                   | *       | -14.16 to -0.7363              |        |        |        |        |        |        |        |        |        |        |
| 2019AI vs 2019ED                           | -3.047    | 2.129  | No                    | ns      | -9.760 to 3.667                |        |        |        |        |        |        |        |        |        |        |
| 2019AI vs 2019MD                           | 0.1517    | 0.106  | No                    | ns      | -6.562 to 6.865                |        |        |        |        |        |        |        |        |        |        |
| 2019AI vs 2019LD                           | 6.74      | 4.709  | Yes                   | *       | 0.02642 to 13.45               |        |        |        |        |        |        |        |        |        |        |
| 2019AI vs 2019DD                           | 2.728     | 1.906  | No                    | ns      | -3.985 to 9.442                |        |        |        |        |        |        |        |        |        |        |
| 2019ED vs 2019MD                           | 3.198     | 2.235  | No                    | ns      | -3.515 to 9.912                |        |        |        |        |        |        |        |        |        |        |
| 2019ED vs 2019LD                           | 9.787     | 6.838  | Yes                   | ***     | 3.073 to 16.50                 |        |        |        |        |        |        |        |        |        |        |
| 2019ED vs 2019DD                           | 5.775     | 4.035  | No                    | ns      | -0.9386 to 12.49               |        |        |        |        |        |        |        |        |        |        |
| 2019MD vs 2019LD                           | 6.588     | 4.603  | No                    | ns      | -0.1253 to 13.30               |        |        |        |        |        |        |        |        |        |        |
| 2019MD vs 2019DD                           | 2.577     | 1.8    | No                    | ns      | -4.137 to 9.290                |        |        |        |        |        |        |        |        |        |        |
| 2019LD vs 2019DD                           | -4.012    | 2.803  | No                    | ns      | -10.73 to 2.702                |        |        |        |        |        |        |        |        |        |        |

Tukey  
Significance Level: 0.05

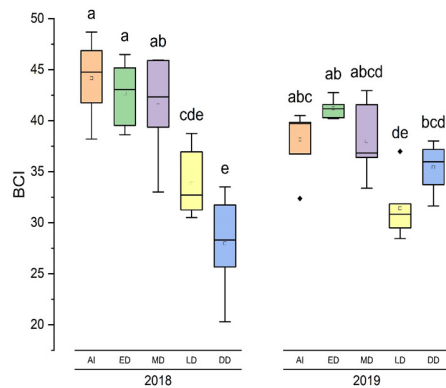

**Table S3. Tukey's test outputs**

| 1way ANOVA - Compare all pair: Blush coverage |            |        |                       |         | 1way ANOVA of Data-Column: Blush coverage |        |        |        |        |        |        |        |        |        |  |
|-----------------------------------------------|------------|--------|-----------------------|---------|-------------------------------------------|--------|--------|--------|--------|--------|--------|--------|--------|--------|--|
| Parameter                                     |            |        |                       |         | 2018AI                                    | 2018ED | 2018MD | 2018LD | 2018DD | 2019AI | 2019ED | 2019MD | 2019LD | 2019DD |  |
| Table Analyzed                                | Blushcover |        |                       |         | Number o                                  | 6      | 6      | 6      | 6      | 6      | 6      | 6      | 6      | 6      |  |
| One-way analysis of variance                  |            |        |                       |         | Minimum                                   | 65     | 65     | 56.7   | 50.12  | 33     | 58.7   | 67.7   | 55.7   | 48.3   |  |
| P value                                       | <0.0001    |        |                       |         | 25% Perce                                 | 65     | 65.75  | 63.68  | 51.64  | 34.5   | 59.68  | 69.43  | 56.15  | 49.58  |  |
| P value summary                               | ***        |        |                       |         | Median                                    | 66.35  | 66.15  | 67.5   | 55.12  | 38.65  | 60.35  | 72     | 58     | 51.7   |  |
| Are means signif. different? (P < 0.05)       | Yes        |        |                       |         | 75% Perce                                 | 72.25  | 67.75  | 68.5   | 59.7   | 40.5   | 62.75  | 74.02  | 60     | 55.43  |  |
| Number of groups                              | 10         |        |                       |         | Maximum                                   | 73     | 70     | 70     | 60     | 45     | 65     | 75     | 60     | 56.7   |  |
| F                                             | 51.48      |        |                       |         | Mean                                      | 67.95  | 66.72  | 65.95  | 55.35  | 38.22  | 61.07  | 71.73  | 58     | 52.23  |  |
| R squared                                     | 0.9026     |        |                       |         | Std. Devia                                | 3.597  | 1.733  | 4.722  | 4.072  | 4.118  | 2.207  | 2.643  | 1.809  | 3.182  |  |
| Bartlett's test for equal variances           |            |        |                       |         | Std. Error                                | 1.468  | 0.7073 | 1.928  | 1.662  | 1.681  | 0.901  | 1.079  | 0.7385 | 1.299  |  |
| Bartlett's statistic (corrected)              | 9.205      |        |                       |         | Lower 95%                                 | 64.18  | 64.9   | 60.99  | 51.08  | 33.89  | 58.75  | 68.96  | 56.1   | 48.89  |  |
| P value                                       | 0.4185     |        |                       |         | Upper 95%                                 | 71.72  | 68.53  | 70.91  | 59.62  | 42.54  | 63.38  | 74.51  | 59.9   | 55.57  |  |
| P value summary                               | ns         |        |                       |         |                                           |        |        |        |        |        |        |        |        |        |  |
| Do the variances differ signif. (P < 0.05)    | No         |        |                       |         |                                           |        |        |        |        |        |        |        |        |        |  |
| ANOVA Table                                   | SS         | df     | MS                    |         |                                           |        |        |        |        |        |        |        |        |        |  |
| Treatment (between columns)                   | 5057       | 9      | 561.9                 |         |                                           |        |        |        |        |        |        |        |        |        |  |
| Residual (within columns)                     | 545.8      | 50     | 10.92                 |         |                                           |        |        |        |        |        |        |        |        |        |  |
| Total                                         | 5603       | 59     |                       |         |                                           |        |        |        |        |        |        |        |        |        |  |
| Tukey's Multiple Comparison Test              | Mean Diff  | q      | Significant? P < 0.05 | Summary | 95% CI of diff                            |        |        |        |        |        |        |        |        |        |  |
| 2018AI vs 2018ED                              | 1.233      | 0.9144 | No                    | ns      | -5.093 to 7.560                           |        |        |        |        |        |        |        |        |        |  |
| 2018AI vs 2018MD                              | 2          | 1.483  | No                    | ns      | -4.327 to 8.327                           |        |        |        |        |        |        |        |        |        |  |
| 2018AI vs 2018LD                              | 12.6       | 9.34   | Yes                   | ***     | 6.272 to 18.92                            |        |        |        |        |        |        |        |        |        |  |
| 2018AI vs 2018DD                              | 29.73      | 22.04  | Yes                   | ***     | 23.41 to 36.06                            |        |        |        |        |        |        |        |        |        |  |
| 2018AI vs 2019AI                              | 6.883      | 5.103  | Yes                   | *       | 0.5568 to 13.21                           |        |        |        |        |        |        |        |        |        |  |
| 2018AI vs 2019ED                              | -3.783     | 2.805  | No                    | ns      | -10.11 to 2.543                           |        |        |        |        |        |        |        |        |        |  |
| 2018AI vs 2019MD                              | 9.95       | 7.377  | Yes                   | ***     | 3.623 to 16.28                            |        |        |        |        |        |        |        |        |        |  |
| 2018AI vs 2019LD                              | 9.183      | 6.809  | Yes                   | ***     | 2.857 to 15.51                            |        |        |        |        |        |        |        |        |        |  |
| 2018AI vs 2019DD                              | 15.72      | 11.65  | Yes                   | ***     | 9.390 to 22.04                            |        |        |        |        |        |        |        |        |        |  |
| 2018ED vs 2018MD                              | 0.7667     | 0.5684 | No                    | ns      | -5.560 to 7.093                           |        |        |        |        |        |        |        |        |        |  |
| 2018ED vs 2018LD                              | 11.37      | 8.426  | Yes                   | ***     | 5.038 to 17.69                            |        |        |        |        |        |        |        |        |        |  |
| 2018ED vs 2018DD                              | 28.5       | 21.13  | Yes                   | ***     | 22.17 to 34.83                            |        |        |        |        |        |        |        |        |        |  |
| 2018ED vs 2019AI                              | 5.65       | 4.189  | No                    | ns      | -0.6765 to 11.98                          |        |        |        |        |        |        |        |        |        |  |
| 2018ED vs 2019ED                              | -5.017     | 3.719  | No                    | ns      | -11.34 to 1.310                           |        |        |        |        |        |        |        |        |        |  |
| 2018ED vs 2019MD                              | 8.717      | 6.463  | Yes                   | **      | 2.390 to 15.04                            |        |        |        |        |        |        |        |        |        |  |
| 2018ED vs 2019LD                              | 7.95       | 5.894  | Yes                   | **      | 1.623 to 14.28                            |        |        |        |        |        |        |        |        |        |  |
| 2018ED vs 2019DD                              | 14.48      | 10.74  | Yes                   | ***     | 8.157 to 20.81                            |        |        |        |        |        |        |        |        |        |  |
| 2018MD vs 2018LD                              | 10.6       | 7.858  | Yes                   | ***     | 4.272 to 16.92                            |        |        |        |        |        |        |        |        |        |  |
| 2018MD vs 2018DD                              | 27.73      | 20.56  | Yes                   | ***     | 21.41 to 34.06                            |        |        |        |        |        |        |        |        |        |  |
| 2018MD vs 2019AI                              | 4.883      | 3.621  | No                    | ns      | -1.443 to 11.21                           |        |        |        |        |        |        |        |        |        |  |
| 2018MD vs 2019ED                              | -5.783     | 4.288  | No                    | ns      | -12.11 to 0.5432                          |        |        |        |        |        |        |        |        |        |  |
| 2018MD vs 2019MD                              | 7.95       | 5.894  | Yes                   | **      | 1.623 to 14.28                            |        |        |        |        |        |        |        |        |        |  |
| 2018MD vs 2019LD                              | 7.183      | 5.326  | Yes                   | *       | 0.8568 to 13.51                           |        |        |        |        |        |        |        |        |        |  |
| 2018MD vs 2019DD                              | 13.72      | 10.17  | Yes                   | ***     | 7.390 to 20.04                            |        |        |        |        |        |        |        |        |        |  |
| 2018LD vs 2018DD                              | 17.14      | 12.7   | Yes                   | ***     | 10.81 to 23.46                            |        |        |        |        |        |        |        |        |        |  |
| 2018LD vs 2019AI                              | -5.715     | 4.237  | No                    | ns      | -12.04 to 0.6115                          |        |        |        |        |        |        |        |        |        |  |
| 2018LD vs 2019ED                              | -16.38     | 12.15  | Yes                   | ***     | -22.71 to -10.06                          |        |        |        |        |        |        |        |        |        |  |
| 2018LD vs 2019MD                              | -2.648     | 1.963  | No                    | ns      | -8.975 to 3.678                           |        |        |        |        |        |        |        |        |        |  |
| 2018LD vs 2019LD                              | -3.415     | 2.532  | No                    | ns      | -9.742 to 2.912                           |        |        |        |        |        |        |        |        |        |  |
| 2018LD vs 2019DD                              | 3.118      | 2.312  | No                    | ns      | -3.208 to 9.445                           |        |        |        |        |        |        |        |        |        |  |
| 2018DD vs 2019AI                              | -22.85     | 16.94  | Yes                   | ***     | -29.18 to -16.52                          |        |        |        |        |        |        |        |        |        |  |
| 2018DD vs 2019ED                              | -33.52     | 24.85  | Yes                   | ***     | -39.84 to -27.19                          |        |        |        |        |        |        |        |        |        |  |
| 2018DD vs 2019MD                              | -19.78     | 14.67  | Yes                   | ***     | -26.11 to -13.46                          |        |        |        |        |        |        |        |        |        |  |
| 2018DD vs 2019LD                              | -20.55     | 15.24  | Yes                   | ***     | -26.88 to -14.22                          |        |        |        |        |        |        |        |        |        |  |
| 2018DD vs 2019DD                              | -14.02     | 10.39  | Yes                   | ***     | -20.34 to -7.690                          |        |        |        |        |        |        |        |        |        |  |
| 2019AI vs 2019ED                              | -10.67     | 7.908  | Yes                   | ***     | -16.99 to -4.340                          |        |        |        |        |        |        |        |        |        |  |
| 2019AI vs 2019MD                              | 3.067      | 2.274  | No                    | ns      | -3.260 to 9.393                           |        |        |        |        |        |        |        |        |        |  |
| 2019AI vs 2019LD                              | 2.3        | 1.705  | No                    | ns      | -4.027 to 8.627                           |        |        |        |        |        |        |        |        |        |  |
| 2019AI vs 2019DD                              | 8.833      | 6.549  | Yes                   | **      | 2.507 to 15.16                            |        |        |        |        |        |        |        |        |        |  |
| 2019ED vs 2019MD                              | 13.73      | 10.18  | Yes                   | ***     | 7.407 to 20.06                            |        |        |        |        |        |        |        |        |        |  |
| 2019ED vs 2019LD                              | 12.97      | 9.614  | Yes                   | ***     | 6.640 to 19.29                            |        |        |        |        |        |        |        |        |        |  |
| 2019ED vs 2019DD                              | 19.5       | 14.46  | Yes                   | ***     | 13.17 to 25.83                            |        |        |        |        |        |        |        |        |        |  |
| 2019MD vs 2019LD                              | -0.7667    | 0.5684 | No                    | ns      | -7.093 to 5.560                           |        |        |        |        |        |        |        |        |        |  |
| 2019MD vs 2019DD                              | 5.767      | 4.275  | No                    | ns      | -0.5599 to 12.09                          |        |        |        |        |        |        |        |        |        |  |
| 2019LD vs 2019DD                              | 6.533      | 4.844  | Yes                   | *       | 0.2068 to 12.86                           |        |        |        |        |        |        |        |        |        |  |

Tukey

Significance Level: 0.05

Tukey  
Significance Level: 0.05

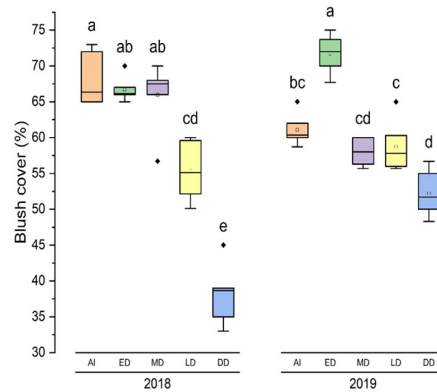



Table S3. Tukey's test outputs

| 1way ANOVA - Compare all pair: Fruit size (weight) |             |        |                       |         | 1way ANOVA of Data-Column: Fruit size (weight) |            |        |        |        |        |        |        |        |        |        |
|----------------------------------------------------|-------------|--------|-----------------------|---------|------------------------------------------------|------------|--------|--------|--------|--------|--------|--------|--------|--------|--------|
| Parameter                                          |             |        |                       |         |                                                | 2018AI     | 2018ED | 2018MD | 2018LD | 2018DD | 2019AI | 2019ED | 2019MD | 2019LD | 2019DD |
| Table Analyzed                                     | Size        |        |                       |         |                                                | Number o   | 6      | 6      | 6      | 6      | 6      | 6      | 6      | 6      | 6      |
|                                                    |             |        |                       |         |                                                |            |        |        |        |        |        |        |        |        |        |
| One-way analysis of variance                       |             |        |                       |         |                                                | Minimum    | 223.7  | 225.9  | 215.4  | 211.1  | 129.6  | 249.7  | 234.2  | 224.3  | 211.4  |
| P value                                            | < 0.0001    |        |                       |         |                                                | 25% Perce  | 235.3  | 226.3  | 217    | 213.9  | 139.2  | 251.3  | 236.8  | 236    | 228.3  |
| P value summary                                    | ***         |        |                       |         |                                                | Median     | 244.2  | 232.9  | 222.3  | 221.1  | 155.6  | 254.4  | 246.1  | 244.5  | 219.5  |
| Are means signif. different? (P < 0.05)            |             |        |                       |         |                                                | 75% Perce  | 250.5  | 243.2  | 228.5  | 223.2  | 168    | 260.7  | 252.6  | 249.9  | 229.3  |
| Number of groups                                   | 10          |        |                       |         |                                                | Maximum    | 251.8  | 248.7  | 231.2  | 225.2  | 169.9  | 260.9  | 254.6  | 251.4  | 234.1  |
| F                                                  | 63.89       |        |                       |         |                                                |            |        |        |        |        |        |        |        |        |        |
| R squared                                          | 0.92        |        |                       |         |                                                | Mean       | 242.2  | 234.7  | 222.7  | 219.3  | 153.4  | 255.3  | 245.1  | 243.1  | 221.2  |
|                                                    |             |        |                       |         |                                                | Std. Devia | 10.13  | 9.026  | 6.22   | 5.313  | 15.84  | 4.62   | 8.384  | 8.133  | 8.722  |
| Bartlett's test for equal variances                |             |        |                       |         |                                                | Std. Error | 4.135  | 3.685  | 2.539  | 2.169  | 6.466  | 1.886  | 3.423  | 3.32   | 3.561  |
| Bartlett's statistic (corrected)                   | 13.79       |        |                       |         |                                                |            |        |        |        |        |        |        |        |        |        |
| P value                                            | 0.1298      |        |                       |         |                                                | Lower 95%  | 231.6  | 225.2  | 216.2  | 213.7  | 136.8  | 250.5  | 236.3  | 234.6  | 212.2  |
| P value summary                                    | ns          |        |                       |         |                                                | Upper 95%  | 252.8  | 244.2  | 229.2  | 224.9  | 170    | 260.1  | 253.9  | 251.6  | 230.4  |
| Do the variances differ signif. (P < 0.05)         |             |        |                       |         |                                                |            |        |        |        |        |        |        |        |        |        |
|                                                    |             |        |                       |         |                                                |            |        |        |        |        |        |        |        |        |        |
| ANOVA Table                                        | SS          | df     | MS                    |         |                                                |            |        |        |        |        |        |        |        |        |        |
| Treatment (between columns)                        | 43310       | 9      | 4813                  |         |                                                |            |        |        |        |        |        |        |        |        |        |
| Residual (within columns)                          | 3766        | 50     | 75.33                 |         |                                                |            |        |        |        |        |        |        |        |        |        |
| Total                                              | 47080       | 59     |                       |         |                                                |            |        |        |        |        |        |        |        |        |        |
|                                                    |             |        |                       |         |                                                |            |        |        |        |        |        |        |        |        |        |
| Tukey's Multiple Comparison Test                   | Mean Diff q |        | Significant? P < 0.05 | Summary | 95% CI of diff                                 |            |        |        |        |        |        |        |        |        |        |
| 2018AI vs 2018ED                                   | 7.5         | 2.117  | No                    | ns      | -9.120 to 24.12                                |            |        |        |        |        |        |        |        |        |        |
| 2018AI vs 2018MD                                   | 19.5        | 5.503  | Yes                   | **      | 2.880 to 36.12                                 |            |        |        |        |        |        |        |        |        |        |
| 2018AI vs 2018LD                                   | 22.9        | 6.463  | Yes                   | **      | 6.280 to 39.52                                 |            |        |        |        |        |        |        |        |        |        |
| 2018AI vs 2018DD                                   | 88.8        | 25.06  | Yes                   | ***     | 72.18 to 105.4                                 |            |        |        |        |        |        |        |        |        |        |
| 2018AI vs 2019AI                                   | -13.1       | 3.697  | No                    | ns      | -29.72 to 3.520                                |            |        |        |        |        |        |        |        |        |        |
| 2018AI vs 2019ED                                   | -2.9        | 0.8185 | No                    | ns      | -19.52 to 13.72                                |            |        |        |        |        |        |        |        |        |        |
| 2018AI vs 2019MD                                   | -0.9        | 0.254  | No                    | ns      | -17.52 to 15.72                                |            |        |        |        |        |        |        |        |        |        |
| 2018AI vs 2019LD                                   | 11.6        | 3.274  | No                    | ns      | -5.020 to 28.22                                |            |        |        |        |        |        |        |        |        |        |
| 2018AI vs 2019DD                                   | 21          | 5.927  | Yes                   | **      | 4.380 to 37.62                                 |            |        |        |        |        |        |        |        |        |        |
| 2018ED vs 2018MD                                   | 12          | 3.387  | No                    | ns      | -4.620 to 28.62                                |            |        |        |        |        |        |        |        |        |        |
| 2018ED vs 2018LD                                   | 15.4        | 4.346  | No                    | ns      | -1.220 to 32.02                                |            |        |        |        |        |        |        |        |        |        |
| 2018ED vs 2018DD                                   | 81.3        | 22.95  | Yes                   | ***     | 64.68 to 97.92                                 |            |        |        |        |        |        |        |        |        |        |
| 2018ED vs 2019AI                                   | -20.6       | 5.814  | Yes                   | **      | -37.22 to -3.980                               |            |        |        |        |        |        |        |        |        |        |
| 2018ED vs 2019ED                                   | -10.4       | 2.935  | No                    | ns      | -27.02 to 6.220                                |            |        |        |        |        |        |        |        |        |        |
| 2018ED vs 2019MD                                   | -8.4        | 2.371  | No                    | ns      | -25.02 to 8.220                                |            |        |        |        |        |        |        |        |        |        |
| 2018ED vs 2019LD                                   | 4.1         | 1.157  | No                    | ns      | -12.52 to 20.72                                |            |        |        |        |        |        |        |        |        |        |
| 2018ED vs 2019DD                                   | 13.5        | 3.81   | No                    | ns      | -3.120 to 30.12                                |            |        |        |        |        |        |        |        |        |        |
| 2018MD vs 2018LD                                   | 3.4         | 0.9596 | No                    | ns      | -13.22 to 20.02                                |            |        |        |        |        |        |        |        |        |        |
| 2018MD vs 2018DD                                   | 69.3        | 19.56  | Yes                   | ***     | 52.68 to 85.92                                 |            |        |        |        |        |        |        |        |        |        |
| 2018MD vs 2019AI                                   | -32.6       | 9.201  | Yes                   | ***     | -49.22 to -15.98                               |            |        |        |        |        |        |        |        |        |        |
| 2018MD vs 2019ED                                   | -22.4       | 6.322  | Yes                   | **      | -39.02 to -5.780                               |            |        |        |        |        |        |        |        |        |        |
| 2018MD vs 2019MD                                   | -20.4       | 5.757  | Yes                   | **      | -37.02 to -3.780                               |            |        |        |        |        |        |        |        |        |        |
| 2018MD vs 2019LD                                   | -7.9        | 2.23   | No                    | ns      | -24.52 to 8.720                                |            |        |        |        |        |        |        |        |        |        |
| 2018MD vs 2019DD                                   | 1.5         | 0.4233 | No                    | ns      | -15.12 to 18.12                                |            |        |        |        |        |        |        |        |        |        |
| 2018LD vs 2018DD                                   | 65.9        | 18.6   | Yes                   | ***     | 49.28 to 82.52                                 |            |        |        |        |        |        |        |        |        |        |
| 2018LD vs 2019AI                                   | -36         | 10.16  | Yes                   | ***     | -52.62 to -19.38                               |            |        |        |        |        |        |        |        |        |        |
| 2018LD vs 2019ED                                   | -25.8       | 7.281  | Yes                   | ***     | -42.42 to -9.180                               |            |        |        |        |        |        |        |        |        |        |
| 2018LD vs 2019MD                                   | -23.8       | 6.717  | Yes                   | ***     | -40.42 to -7.180                               |            |        |        |        |        |        |        |        |        |        |
| 2018LD vs 2019LD                                   | -11.3       | 3.189  | No                    | ns      | -27.92 to 5.320                                |            |        |        |        |        |        |        |        |        |        |
| 2018LD vs 2019DD                                   | -1.9        | 0.5362 | No                    | ns      | -18.52 to 14.72                                |            |        |        |        |        |        |        |        |        |        |
| 2018DD vs 2019AI                                   | -101.9      | 28.76  | Yes                   | ***     | -118.5 to -85.28                               |            |        |        |        |        |        |        |        |        |        |
| 2018DD vs 2019ED                                   | -91.7       | 25.88  | Yes                   | ***     | -108.3 to -75.08                               |            |        |        |        |        |        |        |        |        |        |
| 2018DD vs 2019MD                                   | -89.7       | 25.32  | Yes                   | ***     | -106.3 to -73.08                               |            |        |        |        |        |        |        |        |        |        |
| 2018DD vs 2019LD                                   | -77.2       | 21.79  | Yes                   | ***     | -93.82 to -60.58                               |            |        |        |        |        |        |        |        |        |        |
| 2018DD vs 2019DD                                   | -67.8       | 19.14  | Yes                   | ***     | -84.42 to -51.18                               |            |        |        |        |        |        |        |        |        |        |
| 2019AI vs 2019ED                                   | 10.2        | 2.879  | No                    | ns      | -6.420 to 26.82                                |            |        |        |        |        |        |        |        |        |        |
| 2019AI vs 2019MD                                   | 12.2        | 3.443  | No                    | ns      | -4.420 to 28.82                                |            |        |        |        |        |        |        |        |        |        |
| 2019AI vs 2019LD                                   | 24.7        | 6.971  | Yes                   | ***     | 8.080 to 41.32                                 |            |        |        |        |        |        |        |        |        |        |
| 2019AI vs 2019DD                                   | 34.1        | 9.624  | Yes                   | ***     | 17.48 to 50.72                                 |            |        |        |        |        |        |        |        |        |        |
| 2019ED vs 2019MD                                   | 2           | 0.5645 | No                    | ns      | -14.62 to 18.62                                |            |        |        |        |        |        |        |        |        |        |
| 2019ED vs 2019LD                                   | 14.5        | 4.092  | No                    | ns      | -2.120 to 31.12                                |            |        |        |        |        |        |        |        |        |        |
| 2019ED vs 2019DD                                   | 23.9        | 6.745  | Yes                   | ***     | 7.280 to 40.52                                 |            |        |        |        |        |        |        |        |        |        |
| 2019MD vs 2019LD                                   | 12.5        | 3.528  | No                    | ns      | -4.120 to 29.12                                |            |        |        |        |        |        |        |        |        |        |
| 2019MD vs 2019DD                                   | 21.9        | 6.181  | Yes                   | **      | 5.280 to 38.52                                 |            |        |        |        |        |        |        |        |        |        |
| 2019LD vs 2019DD                                   | 9.4         | 2.653  | No                    | ns      | -7.220 to 26.02                                |            |        |        |        |        |        |        |        |        |        |



| New ANOVA - Compare all pairs: IF             |         |       |      |     |  |  |  |  |  | New ANOVA of Data Columns IF |                      |                      |                      |                      |                      |                      |                      |                      |                      |                      |                      |                      |                      |                      |                      |                      |                      |                      |       |       |
|-----------------------------------------------|---------|-------|------|-----|--|--|--|--|--|------------------------------|----------------------|----------------------|----------------------|----------------------|----------------------|----------------------|----------------------|----------------------|----------------------|----------------------|----------------------|----------------------|----------------------|----------------------|----------------------|----------------------|----------------------|----------------------|-------|-------|
| Parameter                                     |         |       |      |     |  |  |  |  |  | 2018harv vs 2018harv         | 2018harv vs 2018post |       |       |
| Table Analyzed                                | FF      |       |      |     |  |  |  |  |  | Number                       | c                    | e                    | e                    | e                    | e                    | e                    | e                    | e                    | e                    | e                    | e                    | e                    | e                    | e                    | e                    | e                    | e                    | e                    | e     |       |
| One-way analysis of variance                  |         |       |      |     |  |  |  |  |  |                              |                      |                      |                      |                      |                      |                      |                      |                      |                      |                      |                      |                      |                      |                      |                      |                      |                      |                      |       |       |
| F-value                                       | <0.0001 |       |      |     |  |  |  |  |  | Minimum                      | 65.91                | 57.95                | 68.27                | 65.98                | 65.98                | 59.88                | 68.04                | 49.41                | 64.66                | 58.48                | 68.91                | 45.42                | 65.06                | 58.58                | 67.86                | 47.99                | 74.47                | 66.69                | 67.12 | 41.91 |
| F-value summary                               | ***     |       |      |     |  |  |  |  |  | Median                       | 67.99                | 57.96                | 70.92                | 66.49                | 66.18                | 62.27                | 70.49                | 49.91                | 67.21                | 59.38                | 71.04                | 49.33                | 66.13                | 58.77                | 69.4                 | 48.6                 | 75.04                | 68.28                | 68.95 | 45.53 |
| Are means significantly different? (P < 0.05) |         |       |      |     |  |  |  |  |  | Std error                    | 0.6467               | 0.2462               | 1.4612               | 0.1829               | 0.1474               | 1.204                | 0.7961               | 0.4467               | 1.164                | 0.2495               | 0.8388               | 1.385                | 0.4086               | 0.2201               | 0.7023               | 0.6038               | 1.194                | 0.1809               | 1.180 |       |
| Number of groups                              | 20      |       |      |     |  |  |  |  |  | Maximum                      | 68.91                | 58.7                 | 73.91                | 49.91                | 68.63                | 64.91                | 71.91                | 51.91                | 70.34                | 61.02                | 71.96                | 51.58                | 67.06                | 59.91                | 71.97                | 59.91                | 77.12                | 71.91                | 70.46 | 47.12 |
| t-Test                                        |         |       |      |     |  |  |  |  |  |                              |                      |                      |                      |                      |                      |                      |                      |                      |                      |                      |                      |                      |                      |                      |                      |                      |                      |                      |       |       |
| t-Test                                        | 118.2   |       |      |     |  |  |  |  |  | Mean                         | 67.7                 | 58.94                | 71.01                | 47.19                | 66.4                 | 62.34                | 70.34                | 50.34                | 67.35                | 58.56                | 70.6                 | 48.91                | 66.1                 | 58.89                | 69.51                | 48.09                | 75.42                | 68.79                | 68.87 | 45.04 |
| t-Test summary                                | 0.0001  |       |      |     |  |  |  |  |  | Std error                    | 1.057                | 0.4461               | 2.824                | 1.035                | 0.7498               | 2.408                | 1.52                 | 0.8891               | 2.329                | 1.081                | 1.058                | 2.171                | 0.8392               | 0.471                | 1.405                | 1.208                | 2.897                | 1.891                | 2.326 |       |
| ANOVA Table                                   | 55      | df    | MS   |     |  |  |  |  |  | Std error                    | 0.6467               | 0.2462               | 1.4612               | 0.1829               | 0.1474               | 1.204                | 0.7961               | 0.4467               | 1.164                | 0.2495               | 0.8388               | 1.385                | 0.4086               | 0.2201               | 0.7023               | 0.6038               | 1.194                | 0.1809               | 1.180 |       |
| Treatment (between columns)                   | 66.71   | 19    | 35.4 |     |  |  |  |  |  | 66.71                        | 58.94                | 71.01                | 47.19                | 66.4                 | 62.34                | 70.34                | 50.34                | 67.35                | 58.56                | 70.6                 | 48.91                | 66.1                 | 58.89                | 69.51                | 48.09                | 75.42                | 68.79                | 68.87                | 45.04 |       |
| Residual (within columns)                     | 178.4   | 40    | 4.45 |     |  |  |  |  |  | 178.4                        | 58.94                | 71.01                | 47.19                | 66.4                 | 62.34                | 70.34                | 50.34                | 67.35                | 58.56                | 70.6                 | 48.91                | 66.1                 | 58.89                | 69.51                | 48.09                | 75.42                | 68.79                | 68.87                | 45.04 |       |
| Total                                         | 686.6   | 59    |      |     |  |  |  |  |  | 686.6                        | 58.94                | 71.01                | 47.19                | 66.4                 | 62.34                | 70.34                | 50.34                | 67.35                | 58.56                | 70.6                 | 48.91                | 66.1                 | 58.89                | 69.51                | 48.09                | 75.42                | 68.79                | 68.87                | 45.04 |       |
| Tukey's Multiple Comparison Test              |         |       |      |     |  |  |  |  |  |                              |                      |                      |                      |                      |                      |                      |                      |                      |                      |                      |                      |                      |                      |                      |                      |                      |                      |                      |       |       |
|                                               |         |       |      |     |  |  |  |  |  | Mean Diff                    |                      |                      |                      |                      |                      |                      |                      |                      |                      | Significance         |                      |                      |                      |                      |                      |                      |                      |                      |       |       |
| 2018harv vs 2018postMD                        | 8.661   | 11.22 | Yes  | *** |  |  |  |  |  | -5.343 to 24.26              |                      |                      |                      |                      |                      |                      |                      |                      |                      |                      |                      |                      |                      |                      |                      |                      |                      |                      |       |       |
| 2018harv vs 2018postMD                        | 3.389   | 3.888 | No   |     |  |  |  |  |  | -1.827 to 2.249              |                      |                      |                      |                      |                      |                      |                      |                      |                      |                      |                      |                      |                      |                      |                      |                      |                      |                      |       |       |
| 2018harv vs 2018postMD                        | 20.151  | 23.79 | Yes  | *** |  |  |  |  |  | 15.99 to 25.03               |                      |                      |                      |                      |                      |                      |                      |                      |                      |                      |                      |                      |                      |                      |                      |                      |                      |                      |       |       |
| 2018harv vs 2018postMD                        | 1.388   | 1.518 | No   |     |  |  |  |  |  | -1.229 to 1.827              |                      |                      |                      |                      |                      |                      |                      |                      |                      |                      |                      |                      |                      |                      |                      |                      |                      |                      |       |       |
| 2018harv vs 2018postMD                        | 5.388   | 6.227 | Yes  | *** |  |  |  |  |  | 0.800 to 9.887               |                      |                      |                      |                      |                      |                      |                      |                      |                      |                      |                      |                      |                      |                      |                      |                      |                      |                      |       |       |
| 2018harv vs 2018postMD                        | 2.437   | 2.827 | No   |     |  |  |  |  |  | -0.999 to 2.082              |                      |                      |                      |                      |                      |                      |                      |                      |                      |                      |                      |                      |                      |                      |                      |                      |                      |                      |       |       |
| 2018harv vs 2018postMD                        | 17.17   | 20.36 | Yes  | *** |  |  |  |  |  | 11.05 to 22.09               |                      |                      |                      |                      |                      |                      |                      |                      |                      |                      |                      |                      |                      |                      |                      |                      |                      |                      |       |       |
| 2018harv vs 2018postMD                        | 8.969   | 9.402 | No   |     |  |  |  |  |  | -1.489 to 4.888              |                      |                      |                      |                      |                      |                      |                      |                      |                      |                      |                      |                      |                      |                      |                      |                      |                      |                      |       |       |
| 2018harv vs 2018postMD                        | 8.14    | 9.442 | Yes  | *** |  |  |  |  |  | 1.622 to 12.66               |                      |                      |                      |                      |                      |                      |                      |                      |                      |                      |                      |                      |                      |                      |                      |                      |                      |                      |       |       |
| 2018harv vs 2018postMD                        | 2.884   | 3.557 | No   |     |  |  |  |  |  | -1.413 to 1.624              |                      |                      |                      |                      |                      |                      |                      |                      |                      |                      |                      |                      |                      |                      |                      |                      |                      |                      |       |       |
| 2018harv vs 2018postMD                        | 18.79   | 21.47 | Yes  | *** |  |  |  |  |  | 14.73 to 21.51               |                      |                      |                      |                      |                      |                      |                      |                      |                      |                      |                      |                      |                      |                      |                      |                      |                      |                      |       |       |
| 2018harv vs 2018postMD                        | 1.666   | 1.883 | No   |     |  |  |  |  |  | -1.812 to 1.125              |                      |                      |                      |                      |                      |                      |                      |                      |                      |                      |                      |                      |                      |                      |                      |                      |                      |                      |       |       |
| 2018harv vs 2018postMD                        | 8.775   | 10.31 | Yes  | *** |  |  |  |  |  | 4.272 to 13.29               |                      |                      |                      |                      |                      |                      |                      |                      |                      |                      |                      |                      |                      |                      |                      |                      |                      |                      |       |       |
| 2018harv vs 2018postMD                        | 1.883   | 2.095 | No   |     |  |  |  |  |  | -0.412 to 2.736              |                      |                      |                      |                      |                      |                      |                      |                      |                      |                      |                      |                      |                      |                      |                      |                      |                      |                      |       |       |
| 2018harv vs 2018postMD                        | 18.77   | 21.76 | Yes  | *** |  |  |  |  |  | 14.76 to 22.79               |                      |                      |                      |                      |                      |                      |                      |                      |                      |                      |                      |                      |                      |                      |                      |                      |                      |                      |       |       |
| 2018harv vs 2018postMD                        | 2.767   | 3.891 | Yes  | *** |  |  |  |  |  | -12.319 to 1.588             |                      |                      |                      |                      |                      |                      |                      |                      |                      |                      |                      |                      |                      |                      |                      |                      |                      |                      |       |       |
| 2018harv vs 2018postMD                        | 1.884   | 1.257 | No   |     |  |  |  |  |  | -0.800 to 3.405              |                      |                      |                      |                      |                      |                      |                      |                      |                      |                      |                      |                      |                      |                      |                      |                      |                      |                      |       |       |
| 2018harv vs 2018postMD                        | 1.187   | 1.181 | No   |     |  |  |  |  |  | -1.681 to 3.943              |                      |                      |                      |                      |                      |                      |                      |                      |                      |                      |                      |                      |                      |                      |                      |                      |                      |                      |       |       |
| 2018harv vs 2018postMD                        | 22.67   | 20.29 | Yes  | *** |  |  |  |  |  | 18.15 to 27.18               |                      |                      |                      |                      |                      |                      |                      |                      |                      |                      |                      |                      |                      |                      |                      |                      |                      |                      |       |       |
| 2018harv vs 2018postMD                        | 12.97   | 11.94 | Yes  | *** |  |  |  |  |  | 17.49 to 4.401               |                      |                      |                      |                      |                      |                      |                      |                      |                      |                      |                      |                      |                      |                      |                      |                      |                      |                      |       |       |
| 2018harv vs 2018postMD                        | 9.129   | 10.19 | Yes  | *** |  |  |  |  |  | -4.611 to 13.45              |                      |                      |                      |                      |                      |                      |                      |                      |                      |                      |                      |                      |                      |                      |                      |                      |                      |                      |       |       |
| 2018harv vs 2018postMD                        | 4.791   | 4.979 | No   |     |  |  |  |  |  | -8.811 to 10.278             |                      |                      |                      |                      |                      |                      |                      |                      |                      |                      |                      |                      |                      |                      |                      |                      |                      |                      |       |       |
| 2018harv vs 2018postMD                        | 21.1    | 24.08 | Yes  | *** |  |  |  |  |  | 16.16 to 27.98               |                      |                      |                      |                      |                      |                      |                      |                      |                      |                      |                      |                      |                      |                      |                      |                      |                      |                      |       |       |
| 2018harv vs 2018postMD                        | 7.907   | 9.172 | Yes  | *** |  |  |  |  |  | 3.389 to 12.43               |                      |                      |                      |                      |                      |                      |                      |                      |                      |                      |                      |                      |                      |                      |                      |                      |                      |                      |       |       |
| 2018harv vs 2018postMD                        | 9.912   | 10.8  | Yes  | *** |  |  |  |  |  | -11.819 to 4.791             |                      |                      |                      |                      |                      |                      |                      |                      |                      |                      |                      |                      |                      |                      |                      |                      |                      |                      |       |       |
| 2018harv vs 2018postMD                        | 1.521   | 1.766 | No   |     |  |  |  |  |  | -1.039 to 2.988              |                      |                      |                      |                      |                      |                      |                      |                      |                      |                      |                      |                      |                      |                      |                      |                      |                      |                      |       |       |
| 2018harv vs 2018postMD                        | 12.16   | 14.76 | Yes  | *** |  |  |  |  |  | 17.079 to 8.037              |                      |                      |                      |                      |                      |                      |                      |                      |                      |                      |                      |                      |                      |                      |                      |                      |                      |                      |       |       |
| 2018harv vs 2018postMD                        | 9.129   | 10.19 | Yes  | *** |  |  |  |  |  | -4.611 to 13.45              |                      |                      |                      |                      |                      |                      |                      |                      |                      |                      |                      |                      |                      |                      |                      |                      |                      |                      |       |       |
| 2018harv vs 2018postMD                        | 4.791   | 4.979 | No   |     |  |  |  |  |  | -8.811 to 10.278             |                      |                      |                      |                      |                      |                      |                      |                      |                      |                      |                      |                      |                      |                      |                      |                      |                      |                      |       |       |
| 2018harv vs 2018postMD                        | 21.1    | 24.08 | Yes  | *** |  |  |  |  |  | 16.16 to 27.98               |                      |                      |                      |                      |                      |                      |                      |                      |                      |                      |                      |                      |                      |                      |                      |                      |                      |                      |       |       |
| 2018harv vs 2018postMD                        | 7.907   | 9.172 | Yes  | *** |  |  |  |  |  | 3.389 to 12.43               |                      |                      |                      |                      |                      |                      |                      |                      |                      |                      |                      |                      |                      |                      |                      |                      |                      |                      |       |       |
| 2018harv vs 2018postMD                        | 9.912   | 10.8  | Yes  | *** |  |  |  |  |  | -11.819 to 4.791             |                      |                      |                      |                      |                      |                      |                      |                      |                      |                      |                      |                      |                      |                      |                      |                      |                      |                      |       |       |
| 2018harv vs 2018postMD                        | 1.521   | 1.766 | No   |     |  |  |  |  |  | -1.039 to 2.988              |                      |                      |                      |                      |                      |                      |                      |                      |                      |                      |                      |                      |                      |                      |                      |                      |                      |                      |       |       |
| 2018harv vs 2018postMD                        | 12.16   | 14.76 | Yes  | *** |  |  |  |  |  | 17.079 to 8.037              |                      |                      |                      |                      |                      |                      |                      |                      |                      |                      |                      |                      |                      |                      |                      |                      |                      |                      |       |       |
| 2018harv vs 2018postMD                        | 9.129   | 10.19 | Yes  | *** |  |  |  |  |  | -4.611 to 13.45              |                      |                      |                      |                      |                      |                      |                      |                      |                      |                      |                      |                      |                      |                      |                      |                      |                      |                      |       |       |
| 2018harv vs 2018postMD                        | 4.791   | 4.979 | No   |     |  |  |  |  |  | -8.811 to 10.278             |                      |                      |                      |                      |                      |                      |                      |                      |                      |                      |                      |                      |                      |                      |                      |                      |                      |                      |       |       |
| 2018harv vs 2018postMD                        | 21.1    | 24.08 | Yes  | *** |  |  |  |  |  | 16.16 to 27.98               |                      |                      |                      |                      |                      |                      |                      |                      |                      |                      |                      |                      |                      |                      |                      |                      |                      |                      |       |       |
| 2018harv vs 2018postMD                        | 7.907   | 9.172 | Yes  | *** |  |  |  |  |  | 3.389 to 12.43               |                      |                      |                      |                      |                      |                      |                      |                      |                      |                      |                      |                      |                      |                      |                      |                      |                      |                      |       |       |
| 2018harv vs 2018postMD                        | 9.912   | 10.8  | Yes  | *** |  |  |  |  |  | -11.819 to 4.791             |                      |                      |                      |                      |                      |                      |                      |                      |                      |                      |                      |                      |                      |                      |                      |                      |                      |                      |       |       |
| 2018harv vs 2018postMD                        | 1.521   | 1.766 | No   |     |  |  |  |  |  | -1.039 to 2.988              |                      |                      |                      |                      |                      |                      |                      |                      |                      |                      |                      |                      |                      |                      |                      |                      |                      |                      |       |       |
| 2018harv vs 2018postMD                        | 12.16   | 14.76 | Yes  | *** |  |  |  |  |  | 17.079 to 8.037              |                      |                      |                      |                      |                      |                      |                      |                      |                      |                      |                      |                      |                      |                      |                      |                      |                      |                      |       |       |
| 2018harv vs 2018postMD                        | 9.129   | 10.19 | Yes  | *** |  |  |  |  |  | -4.611 to 13.45              |                      |                      |                      |                      |                      |                      |                      |                      |                      |                      |                      |                      |                      |                      |                      |                      |                      |                      |       |       |
| 2018harv vs 2018postMD                        | 4.791   | 4.979 | No   |     |  |  |  |  |  | -8.811 to 10.278             |                      |                      |                      |                      |                      |                      |                      |                      |                      |                      |                      |                      |                      |                      |                      |                      |                      |                      |       |       |
| 2018harv vs 2018postMD                        | 21.1    | 24.08 | Yes  | *** |  |  |  |  |  | 16.16 to 27.98               |                      |                      |                      |                      |                      |                      |                      |                      |                      |                      |                      |                      |                      |                      |                      |                      |                      |                      |       |       |
| 2018harv vs 2018postMD                        | 7.907   | 9.172 | Yes  | *** |  |  |  |  |  | 3.389 to 12.43               |                      |                      |                      |                      |                      |                      |                      |                      |                      |                      |                      |                      |                      |                      |                      |                      |                      |                      |       |       |
| 2018harv vs 2018postMD                        | 9.912   | 10.8  | Yes  | *** |  |  |  |  |  | -11.819 to 4.791             |                      |                      |                      |                      |                      |                      |                      |                      |                      |                      |                      |                      |                      |                      |                      |                      |                      |                      |       |       |
| 2018harv vs 2018postMD                        | 1.521   | 1.766 | No   |     |  |  |  |  |  | -1.039 to 2.988              |                      |                      |                      |                      |                      |                      |                      |                      |                      |                      |                      |                      |                      |                      |                      |                      |                      |                      |       |       |
| 2018harv vs 2018postMD                        | 12.16   | 14.76 | Yes  | *** |  |  |  |  |  | 17.079 to 8.037              |                      |                      |                      |                      |                      |                      |                      |                      |                      |                      |                      |                      |                      |                      |                      |                      |                      |                      |       |       |
| 2018harv vs 2018postMD                        | 9.129   | 10.19 | Yes  | *** |  |  |  |  |  | -4.611 to 13.45              |                      |                      |                      |                      |                      |                      |                      |                      |                      |                      |                      |                      |                      |                      |                      |                      |                      |                      |       |       |
| 2018harv vs 2018postMD                        | 4.791   | 4.979 | No   |     |  |  |  |  |  | -8.811 to 10.278             |                      |                      |                      |                      |                      |                      |                      |                      |                      |                      |                      |                      |                      |                      |                      |                      |                      |                      |       |       |
| 2018harv vs 2018postMD                        | 21.1    | 24.08 | Yes  | *** |  |  |  |  |  | 16.16 to 27.98               |                      |                      |                      |                      |                      |                      |                      |                      |                      |                      |                      |                      |                      |                      |                      |                      |                      |                      |       |       |
| 2018harv vs 2018postMD                        | 7.907   | 9.172 | Yes  | *** |  |  |  |  |  | 3.389 to 12.43               |                      |                      |                      |                      |                      |                      |                      |                      |                      |                      |                      |                      |                      |                      |                      |                      |                      |                      |       |       |

Temp ANOVA - Compare all pairs 1A

| One-way analysis of variance     | TA        | Sum of Squares       | df             | Mean Square | F                | Significance | 95% CI of diff |       |       |       |       |       |       |       |       |       |       |       |       |       |       |       |       |
|----------------------------------|-----------|----------------------|----------------|-------------|------------------|--------------|----------------|-------|-------|-------|-------|-------|-------|-------|-------|-------|-------|-------|-------|-------|-------|-------|-------|
| F value                          | ***       | Minimum              | 257.6          | 180.2       | 246.4            | 163.1        | 257.2          | 212.8 | 244.3 | 187.5 | 286.4 | 182.9 | 255.9 | 172   | 249.3 | 184.1 | 246.5 | 176.9 | 257   | 232.9 | 245.7 | 173.7 |       |
| F value summary                  | ***       | Median               | 258.3          | 181.3       | 250.9            | 163.4        | 259.7          | 228.2 | 247.1 | 187.7 | 285.7 | 183.8 | 255.9 | 172.1 | 251   | 249.3 | 184.7 | 246.7 | 176.9 | 257   | 232.9 | 245.7 | 173.7 |
| Anova significant? (P < 0.05)    | Yes       | 75th Percentile      | 266.2          | 188.6       | 265.6            | 165.6        | 268.9          | 233.6 | 246.7 | 189.7 | 287.2 | 187.2 | 261.3 | 172.6 | 261.5 | 249.6 | 185.7 | 249.9 | 178.7 | 249.9 | 247.4 | 247.6 | 174.7 |
| Number of groups                 | 20        | Mean                 | 266.2          | 188.6       | 265.6            | 165.6        | 268.9          | 233.6 | 246.7 | 189.7 | 287.2 | 187.2 | 261.3 | 172.6 | 261.5 | 249.6 | 185.7 | 249.9 | 178.7 | 249.9 | 247.4 | 247.6 | 174.7 |
| F summary                        | 85.94     | Std Dev              | 5.82           | 5.748       | 10.87            | 2.605        | 7.301          | 3.309 | 3.451 | 4.395 | 25.14 | 2.904 | 3.075 | 3.939 | 0.949 | 1.548 | 1.308 | 3.863 | 10.12 | 1.19  | 3.771 | 2.262 |       |
| ANOVA Table                      | 16        | df                   | MS             | 206.9       | 180.2            | 246.4        | 163.1          | 257.2 | 212.8 | 244.3 | 187.5 | 286.4 | 182.9 | 255.9 | 172   | 249.3 | 184.1 | 246.5 | 176.9 | 257   | 232.9 | 245.7 | 173.7 |
| Treatment (between columns)      | 120560    | 15                   | 8037           |             |                  |              |                |       |       |       |       |       |       |       |       |       |       |       |       |       |       |       |       |
| Residual (within columns)        | 42776     | 80                   | 532.1          | Lower 95%   | 255.9            | 178          | 165            | 165.6 | 205.8 | 227.4 | 247   | 163.8 | 223.9 | 182.3 | 173   | 178   | 181.3 | 246.5 | 176.9 | 257   | 232.9 | 245.7 | 173.7 |
| Total                            | 124636    | 95                   | 1305.7         | Upper 95%   | 296.9            | 200.9        | 278.7          | 278.7 | 278.7 | 278.7 | 278.7 | 278.7 | 278.7 | 278.7 | 278.7 | 278.7 | 278.7 | 278.7 | 278.7 | 278.7 | 278.7 | 278.7 | 278.7 |
| Tukey's Multiple Comparison Test | Mean Diff | Significance Summary | 95% CI of diff |             |                  |              |                |       |       |       |       |       |       |       |       |       |       |       |       |       |       |       |       |
| 2020harv vs 2020post1A           |           | 74.87                | 17.78 Yes      | ***         | 52.74 to 97.00   |              |                |       |       |       |       |       |       |       |       |       |       |       |       |       |       |       |       |
| 2020harv vs 2020post1B           |           | -0.2042              | 0.0002 No      |             | -12.41 to 12.84  |              |                |       |       |       |       |       |       |       |       |       |       |       |       |       |       |       |       |
| 2020harv vs 2020post1C           |           | 96.22                | 22.79 Yes      | ***         | 74.09 to 118.3   |              |                |       |       |       |       |       |       |       |       |       |       |       |       |       |       |       |       |
| 2020harv vs 2020post1D           |           | 5.225                | 1.226 No       |             | -27.34 to 38.85  |              |                |       |       |       |       |       |       |       |       |       |       |       |       |       |       |       |       |
| 2020harv vs 2020post1E           |           | 89.49                | 8.337 Yes      | ***         | 67.30 to 111.6   |              |                |       |       |       |       |       |       |       |       |       |       |       |       |       |       |       |       |
| 2020harv vs 2020post1F           |           | 14.55                | 1.446 No       |             | -27.34 to 38.85  |              |                |       |       |       |       |       |       |       |       |       |       |       |       |       |       |       |       |
| 2020harv vs 2020post1G           |           | 10.88                | 16.76 Yes      | ***         | 68.74 to 103.0   |              |                |       |       |       |       |       |       |       |       |       |       |       |       |       |       |       |       |
| 2020harv vs 2020post1H           |           | 0.9253               | 0.0249 No      |             | -22.01 to 22.23  |              |                |       |       |       |       |       |       |       |       |       |       |       |       |       |       |       |       |
| 2020harv vs 2020post1I           |           | 75.21                | 17.81 Yes      | ***         | 53.06 to 97.34   |              |                |       |       |       |       |       |       |       |       |       |       |       |       |       |       |       |       |
| 2020harv vs 2020post1J           |           | 2.665                | 0.636 No       |             | -19.41 to 24.81  |              |                |       |       |       |       |       |       |       |       |       |       |       |       |       |       |       |       |
| 2020harv vs 2020post1K           |           | 89.46                | 21.30 Yes      | ***         | 67.30 to 111.6   |              |                |       |       |       |       |       |       |       |       |       |       |       |       |       |       |       |       |
| 2020harv vs 2020post1L           |           | 0.1026               | 0.1187 No      |             | -13.01 to 13.21  |              |                |       |       |       |       |       |       |       |       |       |       |       |       |       |       |       |       |
| 2020harv vs 2020post1M           |           | 76.29                | 18.07 Yes      | ***         | 54.36 to 98.42   |              |                |       |       |       |       |       |       |       |       |       |       |       |       |       |       |       |       |
| 2020harv vs 2020post1N           |           | 11.92                | 1.822 No       |             | -12.31 to 36.04  |              |                |       |       |       |       |       |       |       |       |       |       |       |       |       |       |       |       |
| 2020harv vs 2020post1O           |           | 82.33                | 18.48 Yes      | ***         | 60.20 to 104.4   |              |                |       |       |       |       |       |       |       |       |       |       |       |       |       |       |       |       |
| 2020harv vs 2020post1P           |           | 21.84                | 3.798 No       |             | -4.03 to 5.094   |              |                |       |       |       |       |       |       |       |       |       |       |       |       |       |       |       |       |
| 2020harv vs 2020post1Q           |           | 27.61                | 4.538 No       |             | -4.476 to 40.74  |              |                |       |       |       |       |       |       |       |       |       |       |       |       |       |       |       |       |
| 2020harv vs 2020post1R           |           | 13.26                | 1.343 No       |             | -8.868 to 35.39  |              |                |       |       |       |       |       |       |       |       |       |       |       |       |       |       |       |       |
| 2020harv vs 2020post1S           |           | 86.34                | 20.13 Yes      | ***         | 64.41 to 108.7   |              |                |       |       |       |       |       |       |       |       |       |       |       |       |       |       |       |       |
| 2020harv vs 2020post1T           |           | 75.16                | 17.47 Yes      | ***         | 52.74 to 97.00   |              |                |       |       |       |       |       |       |       |       |       |       |       |       |       |       |       |       |
| 2020post1 vs 2020post1A          |           | 21.34                | 3.593 No       |             | -2.789 to 14.47  |              |                |       |       |       |       |       |       |       |       |       |       |       |       |       |       |       |       |
| 2020post1 vs 2020post1B          |           | -80.09               | -18.97 Yes     | ***         | -102.21 to 57.96 |              |                |       |       |       |       |       |       |       |       |       |       |       |       |       |       |       |       |
| 2020post1 vs 2020post1C          |           | 34.86                | 8.366 No       |             | -7.744 to 14.33  |              |                |       |       |       |       |       |       |       |       |       |       |       |       |       |       |       |       |
| 2020post1 vs 2020post1D          |           | -60.12               | -14.29 Yes     | ***         | -82.45 to 38.13  |              |                |       |       |       |       |       |       |       |       |       |       |       |       |       |       |       |       |
| 2020post1 vs 2020post1E          |           | 3.993                | 0.0497 No      |             | -26.11 to 38.14  |              |                |       |       |       |       |       |       |       |       |       |       |       |       |       |       |       |       |
| 2020post1 vs 2020post1F          |           | -74.77               | -17.73 Yes     | ***         | -96.90 to 52.68  |              |                |       |       |       |       |       |       |       |       |       |       |       |       |       |       |       |       |
| 2020post1 vs 2020post1G          |           | 0.9409               | 0.0097 No      |             | -21.79 to 22.47  |              |                |       |       |       |       |       |       |       |       |       |       |       |       |       |       |       |       |
| 2020post1 vs 2020post1H          |           | -72.10               | -17.13 Yes     | ***         | -94.23 to 50.06  |              |                |       |       |       |       |       |       |       |       |       |       |       |       |       |       |       |       |
| 2020post1 vs 2020post1I          |           | 14.38                | 1.854 No       |             | -7.545 to 36.71  |              |                |       |       |       |       |       |       |       |       |       |       |       |       |       |       |       |       |
| 2020post1 vs 2020post1J          |           | -75.8                | -17.89 Yes     | ***         | -97.93 to 54.67  |              |                |       |       |       |       |       |       |       |       |       |       |       |       |       |       |       |       |
| 2020post1 vs 2020post1K          |           | 1.438                | 0.1889 No      |             | -20.71 to 23.55  |              |                |       |       |       |       |       |       |       |       |       |       |       |       |       |       |       |       |
| 2020post1 vs 2020post1L          |           | -62.86               | -14.95 Yes     | ***         | -85.09 to 45.83  |              |                |       |       |       |       |       |       |       |       |       |       |       |       |       |       |       |       |
| 2020post1 vs 2020post1M          |           | 7.861                | 1.343 No       |             | -14.71 to 29.49  |              |                |       |       |       |       |       |       |       |       |       |       |       |       |       |       |       |       |
| 2020post1 vs 2020post1N          |           | -96.81               | -22.85 Yes     | ***         | -118.16 to 74.68 |              |                |       |       |       |       |       |       |       |       |       |       |       |       |       |       |       |       |
| 2020post1 vs 2020post1O          |           | -42.22               | -12.21 Yes     | ***         | -68.92 to 24.44  |              |                |       |       |       |       |       |       |       |       |       |       |       |       |       |       |       |       |
| 2020post1 vs 2020post1P          |           | -61.61               | -14.59 Yes     | ***         | -83.74 to 38.48  |              |                |       |       |       |       |       |       |       |       |       |       |       |       |       |       |       |       |
| 2020post1 vs 2020post1Q          |           | 11.67                | 1.296 No       |             | -12.46 to 35.80  |              |                |       |       |       |       |       |       |       |       |       |       |       |       |       |       |       |       |
| 2020post1 vs 2020post1R          |           | 86.51                | 22.88 Yes      | ***         | 64.36 to 108.6   |              |                |       |       |       |       |       |       |       |       |       |       |       |       |       |       |       |       |
| 2020post1 vs 2020post1S          |           | 4.923                | 1.068 No       |             | -27.05 to 17.21  |              |                |       |       |       |       |       |       |       |       |       |       |       |       |       |       |       |       |
| 2020post1 vs 2020post1T          |           | 38.32                | 8.407 Yes      | ***         | 17.59 to 61.05   |              |                |       |       |       |       |       |       |       |       |       |       |       |       |       |       |       |       |
| 2020post1 vs 2020post1U          |           | 14.84                | 1.512 No       |             | -7.289 to 36.97  |              |                |       |       |       |       |       |       |       |       |       |       |       |       |       |       |       |       |
| 2020post1 vs 2020post1V          |           | 72.47                | 16.26 Yes      | ***         | 50.24 to 94.7    |              |                |       |       |       |       |       |       |       |       |       |       |       |       |       |       |       |       |
| 2020post1 vs 2020post1W          |           | 0.9393               | 0.0093 No      |             | -21.74 to 22.52  |              |                |       |       |       |       |       |       |       |       |       |       |       |       |       |       |       |       |
| 2020post1 vs 2020post1X          |           | 75.51                | 17.88 Yes      | ***         | 53.86 to 97.13   |              |                |       |       |       |       |       |       |       |       |       |       |       |       |       |       |       |       |
| 2020post1 vs 2020post1Y          |           | 2.077                | 0.3055 No      |             | -13.51 to 25.11  |              |                |       |       |       |       |       |       |       |       |       |       |       |       |       |       |       |       |
| 2020post1 vs 2020post1Z          |           | 89.75                | 22.16 Yes      | ***         | 67.62 to 111.9   |              |                |       |       |       |       |       |       |       |       |       |       |       |       |       |       |       |       |
| 2020post2 vs 2020post2A          |           | 64.618               | 14.486 No      |             | -12.70 to 11.50  |              |                |       |       |       |       |       |       |       |       |       |       |       |       |       |       |       |       |
| 2020post2 vs 2020post2B          |           | 75.58                | 18.24 Yes      | ***         | 54.45 to 96.71   |              |                |       |       |       |       |       |       |       |       |       |       |       |       |       |       |       |       |
| 2020post2 vs 2020post2C          |           | 12.14                | 1.296 No       |             | -12.46 to 35.80  |              |                |       |       |       |       |       |       |       |       |       |       |       |       |       |       |       |       |
| 2020post2 vs 2020post2D          |           | 82.03                | 18.55 Yes      | ***         | 60.40 to 104.7   |              |                |       |       |       |       |       |       |       |       |       |       |       |       |       |       |       |       |
| 2020post2 vs 2020post2E          |           | -21.65               | -5.127 No      |             | -43.76 to 18.623 |              |                |       |       |       |       |       |       |       |       |       |       |       |       |       |       |       |       |
| 2020post2 vs 2020post2F          |           | 27.19                | 4.607 No       |             | -7.76 to 59.53   |              |                |       |       |       |       |       |       |       |       |       |       |       |       |       |       |       |       |
| 2020post2 vs 2020post2G          |           | 13.55                | 1.315 No       |             | -8.579 to 35.68  |              |                |       |       |       |       |       |       |       |       |       |       |       |       |       |       |       |       |
| 2020post2 vs 2020post2H          |           | 86.83                | 20.10 Yes      | ***         | 64.71 to 108.0   |              |                |       |       |       |       |       |       |       |       |       |       |       |       |       |       |       |       |
| 2020post2 vs 2020post2I          |           | -101.4               | -24.02 Yes     | ***         | -123.46 to 78.30 |              |                |       |       |       |       |       |       |       |       |       |       |       |       |       |       |       |       |
| 2020post2 vs 2020post2J          |           | 56.79                | 16.46 Yes      | ***         | 34.69 to 78.86   |              |                |       |       |       |       |       |       |       |       |       |       |       |       |       |       |       |       |
| 2020post2 vs 2020post2K          |           | 81.67                | 18.46 Yes      | ***         | 59.52 to 103.8   |              |                |       |       |       |       |       |       |       |       |       |       |       |       |       |       |       |       |
| 2020post2 vs 2020post2L          |           | 12.14                | 1.296 No       |             | -12.46 to 35.80  |              |                |       |       |       |       |       |       |       |       |       |       |       |       |       |       |       |       |
| 2020post2 vs 2020post2M          |           | 82.03                | 18.55 Yes      | ***         | 60.40 to 104.7   |              |                |       |       |       |       |       |       |       |       |       |       |       |       |       |       |       |       |
| 2020post2 vs 2020post2N          |           | -21.65               | -5.127 No      |             | -43.76 to 18.623 |              |                |       |       |       |       |       |       |       |       |       |       |       |       |       |       |       |       |
| 2020post2 vs 2020post2O          |           | 27.19                | 4.607 No       |             | -7.76 to 59.53   |              |                |       |       |       |       |       |       |       |       |       |       |       |       |       |       |       |       |
| 2020post2 vs 2020post2P          |           | 13.55                | 1.315 No       |             | -8.579 to 35.68  |              |                |       |       |       |       |       |       |       |       |       |       |       |       |       |       |       |       |



| Two-way ANOVA - Compare all pairs: 2018DA |        |  |  | Two-way ANOVA of Data-Column: 2018 DA |         |         |         |         |         |          |          |          |         |         |         |         |         |         |         |  |
|-------------------------------------------|--------|--|--|---------------------------------------|---------|---------|---------|---------|---------|----------|----------|----------|---------|---------|---------|---------|---------|---------|---------|--|
| Parameter                                 |        |  |  | Number of                             | 3       | 3       | 3       | 3       | 3       | 3        | 3        | 3        | 3       | 3       | 3       | 3       | 3       | 3       | 3       |  |
| Table Analyzed                            | DA2018 |  |  |                                       |         |         |         |         |         |          |          |          |         |         |         |         |         |         |         |  |
| One-way analysis of variance              |        |  |  | Minimum                               | 0.8     | 0.72    | 0.79    | 0.79    | 0.87    | 0.69     | 0.6      | 0.68     | 0.69    | 0.77    | 0.4531  | 0.3875  | 0.4018  | 0.43    | 0.6389  |  |
| P value                                   |        |  |  | 25% Perc                              | 0.8     | 0.72    | 0.79    | 0.79    | 0.87    | 0.69     | 0.6      | 0.68     | 0.69    | 0.77    | 0.4531  | 0.3875  | 0.4018  | 0.43    | 0.6389  |  |
| P value summary                           |        |  |  | Median                                | 0.8     | 0.75    | 0.82    | 0.81    | 0.89    | 0.71     | 0.61     | 0.69     | 0.707   | 0.81    | 0.4825  | 0.42    | 0.4127  | 0.44    | 0.667   |  |
| Are means signif. dif                     |        |  |  | 75% Perc                              | 0.84    | 0.77    | 0.82    | 0.89    | 0.95    | 0.72     | 0.63     | 0.71     | 0.763   | 0.86    | 0.4857  | 0.425   | 0.4564  | 0.51    | 0.745   |  |
| Number of groups                          |        |  |  | Maximum                               | 0.84    | 0.77    | 0.82    | 0.89    | 0.95    | 0.72     | 0.63     | 0.71     | 0.763   | 0.86    | 0.4857  | 0.425   | 0.4564  | 0.51    | 0.745   |  |
| F                                         |        |  |  | Mean                                  | 0.8133  | 0.7467  | 0.81    | 0.83    | 0.9033  | 0.7067   | 0.6133   | 0.6933   | 0.72    | 0.8133  | 0.4738  | 0.4108  | 0.4236  | 0.46    | 0.6836  |  |
| R squared                                 |        |  |  | Std. Devial                           | 0.02309 | 0.02517 | 0.01732 | 0.02592 | 0.04163 | 0.01528  | 0.01528  | 0.01528  | 0.0382  | 0.04509 | 0.01799 | 0.02036 | 0.02886 | 0.04359 | 0.05498 |  |
| ANOVA Table                               |        |  |  | Std. Error                            | 0.01333 | 0.01453 | 0.01    | 0.03055 | 0.02404 | 0.008819 | 0.008819 | 0.008819 | 0.02205 | 0.02603 | 0.01038 | 0.01176 | 0.01666 | 0.02517 | 0.03174 |  |
| Treatment (between)                       |        |  |  | Lower 95%                             | 0.756   | 0.6842  | 0.767   | 0.6986  | 0.7999  | 0.6687   | 0.5754   | 0.6554   | 0.6251  | 0.7013  | 0.4291  | 0.3803  | 0.3519  | 0.3517  | 0.5471  |  |
| Residual (within col)                     |        |  |  | Upper 95%                             | 0.8707  | 0.8092  | 0.853   | 0.9614  | 1.007   | 0.7446   | 0.6513   | 0.7313   | 0.8149  | 0.9253  | 0.5184  | 0.4614  | 0.4953  | 0.5683  | 0.8202  |  |
| Total                                     |        |  |  |                                       |         |         |         |         |         |          |          |          |         |         |         |         |         |         |         |  |
| Tukey's Multiple Com Mean Diff q          |        |  |  | Significant Summary 95% CI of diff    |         |         |         |         |         |          |          |          |         |         |         |         |         |         |         |  |
| SP06 AI vs SP06 ED                        |        |  |  | 0.06667                               | 3.462   | No      | ns      |         |         |          |          |          |         |         |         |         |         |         |         |  |
| SP06 AI vs SP06 MD                        |        |  |  | 0.003333                              | 0.1731  | No      | ns      |         |         |          |          |          |         |         |         |         |         |         |         |  |
| SP06 AI vs SP06 LD                        |        |  |  | -0.01667                              | 0.8655  | No      | ns      |         |         |          |          |          |         |         |         |         |         |         |         |  |
| SP06 AI vs SP06 DD                        |        |  |  | -0.09                                 | 4.674   | No      | ns      |         |         |          |          |          |         |         |         |         |         |         |         |  |
| SP06 AI vs SP10AI                         |        |  |  | 0.1067                                | 5.539   | Yes     | *       |         |         |          |          |          |         |         |         |         |         |         |         |  |
| SP06 AI vs SP10 ED                        |        |  |  | 0.2                                   | 10.39   | Yes     | ***     |         |         |          |          |          |         |         |         |         |         |         |         |  |
| SP06 AI vs SP10 MD                        |        |  |  | 0.12                                  | 6.232   | Yes     | **      |         |         |          |          |          |         |         |         |         |         |         |         |  |
| SP06 AI vs SP10 LD                        |        |  |  | 0.09333                               | 4.847   | No      | ns      |         |         |          |          |          |         |         |         |         |         |         |         |  |
| SP06 AI vs SP10 DD                        |        |  |  | 0                                     | 0       | No      | ns      |         |         |          |          |          |         |         |         |         |         |         |         |  |
| SP06 AI vs SP18 AI                        |        |  |  | 0.3396                                | 17.63   | Yes     | ***     |         |         |          |          |          |         |         |         |         |         |         |         |  |
| SP06 AI vs SP18 ED                        |        |  |  | 0.4025                                | 20.9    | Yes     | ***     |         |         |          |          |          |         |         |         |         |         |         |         |  |
| SP06 AI vs SP18 MD                        |        |  |  | 0.3897                                | 20.24   | Yes     | ***     |         |         |          |          |          |         |         |         |         |         |         |         |  |
| SP06 AI vs SP18 LD                        |        |  |  | 0.3533                                | 18.35   | Yes     | ***     |         |         |          |          |          |         |         |         |         |         |         |         |  |
| SP06 AI vs SP18 DD                        |        |  |  | 0.1297                                | 6.736   | Yes     | **      |         |         |          |          |          |         |         |         |         |         |         |         |  |
| SP06 ED vs SP06 MD                        |        |  |  | -0.06333                              | 3.289   | No      | ns      |         |         |          |          |          |         |         |         |         |         |         |         |  |
| SP06 ED vs SP06 LD                        |        |  |  | -0.08333                              | 4.328   | No      | ns      |         |         |          |          |          |         |         |         |         |         |         |         |  |
| SP06 ED vs SP06 DD                        |        |  |  | -0.1567                               | 8.136   | Yes     | ***     |         |         |          |          |          |         |         |         |         |         |         |         |  |
| SP06 ED vs SP10AI                         |        |  |  | 0.04                                  | 2.077   | No      | ns      |         |         |          |          |          |         |         |         |         |         |         |         |  |
| SP06 ED vs SP10 ED                        |        |  |  | 0.1333                                | 6.924   | Yes     | **      |         |         |          |          |          |         |         |         |         |         |         |         |  |
| SP06 ED vs SP10 MD                        |        |  |  | 0.05333                               | 2.77    | No      | ns      |         |         |          |          |          |         |         |         |         |         |         |         |  |
| SP06 ED vs SP10 LD                        |        |  |  | 0.02667                               | 1.385   | No      | ns      |         |         |          |          |          |         |         |         |         |         |         |         |  |
| SP06 ED vs SP10 DD                        |        |  |  | -0.06667                              | 3.462   | No      | ns      |         |         |          |          |          |         |         |         |         |         |         |         |  |
| SP06 ED vs SP18 AI                        |        |  |  | 0.2729                                | 14.17   | Yes     | ***     |         |         |          |          |          |         |         |         |         |         |         |         |  |
| SP06 ED vs SP18 ED                        |        |  |  | 0.3338                                | 17.44   | Yes     | ***     |         |         |          |          |          |         |         |         |         |         |         |         |  |
| SP06 ED vs SP18 MD                        |        |  |  | 0.323                                 | 16.78   | Yes     | ***     |         |         |          |          |          |         |         |         |         |         |         |         |  |
| SP06 ED vs SP18 LD                        |        |  |  | 0.2867                                | 14.89   | Yes     | ***     |         |         |          |          |          |         |         |         |         |         |         |         |  |
| SP06 ED vs SP18 DD                        |        |  |  | 0.06304                               | 3.274   | No      | ns      |         |         |          |          |          |         |         |         |         |         |         |         |  |
| SP06 MD vs SP06 LD                        |        |  |  | -0.02                                 | 1.039   | No      | ns      |         |         |          |          |          |         |         |         |         |         |         |         |  |
| SP06 MD vs SP06 DD                        |        |  |  | -0.09333                              | 4.847   | No      | ns      |         |         |          |          |          |         |         |         |         |         |         |         |  |
| SP06 MD vs SP10AI                         |        |  |  | 0.1033                                | 5.366   | Yes     | *       |         |         |          |          |          |         |         |         |         |         |         |         |  |
| SP06 MD vs SP10 ED                        |        |  |  | 0.1967                                | 10.21   | Yes     | ***     |         |         |          |          |          |         |         |         |         |         |         |         |  |
| SP06 MD vs SP10 MD                        |        |  |  | 0.1167                                | 6.059   | Yes     | *       |         |         |          |          |          |         |         |         |         |         |         |         |  |
| SP06 MD vs SP10 LD                        |        |  |  | 0.09                                  | 4.674   | No      | ns      |         |         |          |          |          |         |         |         |         |         |         |         |  |
| SP06 MD vs SP10 DD                        |        |  |  | -0.00333                              | 0.1731  | No      | ns      |         |         |          |          |          |         |         |         |         |         |         |         |  |
| SP06 MD vs SP18 AI                        |        |  |  | 0.3362                                | 17.46   | Yes     | ***     |         |         |          |          |          |         |         |         |         |         |         |         |  |
| SP06 MD vs SP18 ED                        |        |  |  | 0.3992                                | 20.73   | Yes     | ***     |         |         |          |          |          |         |         |         |         |         |         |         |  |
| SP06 MD vs SP18 MD                        |        |  |  | 0.3864                                | 20.06   | Yes     | ***     |         |         |          |          |          |         |         |         |         |         |         |         |  |
| SP06 MD vs SP18 LD                        |        |  |  | 0.35                                  | 18.38   | Yes     | ***     |         |         |          |          |          |         |         |         |         |         |         |         |  |
| SP06 MD vs SP18 DD                        |        |  |  | 0.1264                                | 6.563   | Yes     | **      |         |         |          |          |          |         |         |         |         |         |         |         |  |
| SP06 LD vs SP06 DD                        |        |  |  | -0.07333                              | 3.808   | No      | ns      |         |         |          |          |          |         |         |         |         |         |         |         |  |
| SP06 LD vs SP10AI                         |        |  |  | 0.1233                                | 6.405   | Yes     | **      |         |         |          |          |          |         |         |         |         |         |         |         |  |
| SP06 LD vs SP10 ED                        |        |  |  | 0.2167                                | 11.25   | Yes     | ***     |         |         |          |          |          |         |         |         |         |         |         |         |  |
| SP06 LD vs SP10 MD                        |        |  |  | 0.1367                                | 7.097   | Yes     | **      |         |         |          |          |          |         |         |         |         |         |         |         |  |
| SP06 LD vs SP10 LD                        |        |  |  | 0.11                                  | 5.712   | Yes     | *       |         |         |          |          |          |         |         |         |         |         |         |         |  |
| SP06 LD vs SP10 DD                        |        |  |  | 0.01667                               | 0.8655  | No      | ns      |         |         |          |          |          |         |         |         |         |         |         |         |  |
| SP06 LD vs SP18 AI                        |        |  |  | 0.3562                                | 18.5    | Yes     | ***     |         |         |          |          |          |         |         |         |         |         |         |         |  |
| SP06 LD vs SP18 ED                        |        |  |  | 0.4192                                | 21.77   | Yes     | ***     |         |         |          |          |          |         |         |         |         |         |         |         |  |
| SP06 LD vs SP18 MD                        |        |  |  | 0.4064                                | 21.1    | Yes     | ***     |         |         |          |          |          |         |         |         |         |         |         |         |  |
| SP06 LD vs SP18 LD                        |        |  |  | 0.37                                  | 19.21   | Yes     | ***     |         |         |          |          |          |         |         |         |         |         |         |         |  |
| SP06 LD vs SP18 DD                        |        |  |  | 0.1464                                | 7.601   | Yes     | ***     |         |         |          |          |          |         |         |         |         |         |         |         |  |
| SP06 DD vs SP10AI                         |        |  |  | 0.1967                                | 10.21   | Yes     | ***     |         |         |          |          |          |         |         |         |         |         |         |         |  |
| SP06 DD vs SP10 ED                        |        |  |  | 0.29                                  | 15.06   | Yes     | ***     |         |         |          |          |          |         |         |         |         |         |         |         |  |
| SP06 DD vs SP10 MD                        |        |  |  | 0.21                                  | 10.91   | Yes     | ***     |         |         |          |          |          |         |         |         |         |         |         |         |  |
| SP06 DD vs SP10 LD                        |        |  |  | 0.1833                                | 9.521   | Yes     | ***     |         |         |          |          |          |         |         |         |         |         |         |         |  |
| SP06 DD vs SP10 DD                        |        |  |  | 0.09                                  | 4.674   | No      | ns      |         |         |          |          |          |         |         |         |         |         |         |         |  |
| SP06 DD vs SP18 AI                        |        |  |  | 0.4296                                | 22.31   | Yes     | ***     |         |         |          |          |          |         |         |         |         |         |         |         |  |
| SP06 DD vs SP18 ED                        |        |  |  | 0.4925                                | 25.58   | Yes     | ***     |         |         |          |          |          |         |         |         |         |         |         |         |  |
| SP06 DD vs SP18 MD                        |        |  |  | 0.4797                                | 24.91   | Yes     | ***     |         |         |          |          |          |         |         |         |         |         |         |         |  |
| SP06 DD vs SP18 LD                        |        |  |  | 0.4433                                | 23.02   | Yes     | ***     |         |         |          |          |          |         |         |         |         |         |         |         |  |
| SP06 DD vs SP18 DD                        |        |  |  | 0.2197                                | 11.41   | Yes     | ***     |         |         |          |          |          |         |         |         |         |         |         |         |  |
| SP10AI vs SP10 ED                         |        |  |  | 0.09333                               | 4.847   | No      | ns      |         |         |          |          |          |         |         |         |         |         |         |         |  |
| SP10AI vs SP10 MD                         |        |  |  | 0.01333                               | 0.6924  | No      | ns      |         |         |          |          |          |         |         |         |         |         |         |         |  |
| SP10AI vs SP10 LD                         |        |  |  | -0.01333                              | 0.6924  | No      | ns      |         |         |          |          |          |         |         |         |         |         |         |         |  |
| SP10AI vs SP10 DD                         |        |  |  | -0.1067                               | 5.539   | Yes     | *       |         |         |          |          |          |         |         |         |         |         |         |         |  |
| SP10AI vs SP18 AI                         |        |  |  | 0.2329                                | 12.1    | Yes     | ***     |         |         |          |          |          |         |         |         |         |         |         |         |  |
| SP10AI vs SP18 ED                         |        |  |  | 0.2958                                | 15.36   | Yes     | ***     |         |         |          |          |          |         |         |         |         |         |         |         |  |
| SP10AI vs SP18 MD                         |        |  |  | 0.283                                 | 14.7    | Yes     | ***     |         |         |          |          |          |         |         |         |         |         |         |         |  |
| SP10AI vs SP18 LD                         |        |  |  | 0.2467                                | 12.81   | Yes     | ***     |         |         |          |          |          |         |         |         |         |         |         |         |  |
| SP10AI vs SP18 DD                         |        |  |  | 0.02304                               | 1.196   | No      | ns      |         |         |          |          |          |         |         |         |         |         |         |         |  |
| SP10 ED vs SP10 MD                        |        |  |  | -0.08                                 | 4.155   | No      | ns      |         |         |          |          |          |         |         |         |         |         |         |         |  |
| SP10 ED vs SP10 LD                        |        |  |  | -0.1067                               | 5.539   | Yes     | *       |         |         |          |          |          |         |         |         |         |         |         |         |  |
| SP10 ED vs SP10 DD                        |        |  |  | -0.2                                  | 10.39   | Yes     | ***     |         |         |          |          |          |         |         |         |         |         |         |         |  |
| SP10 ED vs SP18 AI                        |        |  |  | 0.1396                                | 7.248   | Yes     | **      |         |         |          |          |          |         |         |         |         |         |         |         |  |
| SP10 ED vs SP18 ED                        |        |  |  | 0.2025                                | 10.52   | Yes     | ***     |         |         |          |          |          |         |         |         |         |         |         |         |  |
| SP10 ED vs SP18 MD                        |        |  |  | 0.1897                                | 9.851   | Yes     | ***     |         |         |          |          |          |         |         |         |         |         |         |         |  |
| SP10 ED vs SP18 LD                        |        |  |  | 0.1533                                | 7.963   | Yes     | ***     |         |         |          |          |          |         |         |         |         |         |         |         |  |
| SP10 ED vs SP18 DD                        |        |  |  | -0.0703                               | 3.651   | No      | ns      |         |         |          |          |          |         |         |         |         |         |         |         |  |
| SP10 MD vs SP10 LD                        |        |  |  | -0.02667                              | 1.385   | No      | ns      |         |         |          |          |          |         |         |         |         |         |         |         |  |
| SP10 MD vs SP10 DD                        |        |  |  | -0.12                                 | 6.232   | Yes     | **      |         |         |          |          |          |         |         |         |         |         |         |         |  |
| SP10 MD vs SP18 AI                        |        |  |  | 0.2196                                | 11.4    | Yes     | ***     |         |         |          |          |          |         |         |         |         |         |         |         |  |
| SP10 MD vs SP18 ED                        |        |  |  | 0.2925                                | 14.62   | Yes     | ***     |         |         |          |          |          |         |         |         |         |         |         |         |  |
| SP10 MD vs SP18 MD                        |        |  |  | 0.2697                                | 14.01   | Yes     | ***     |         |         |          |          |          |         |         |         |         |         |         |         |  |
| SP10 MD vs SP18 LD                        |        |  |  | 0.2333                                | 12.12   | Yes     | ***     |         |         |          |          |          |         |         |         |         |         |         |         |  |
| SP10 MD vs SP18 DD                        |        |  |  | 0.009704                              | 0.5039  | No      | ns      |         |         |          |          |          |         |         |         |         |         |         |         |  |
| SP10 LD vs SP10 DD                        |        |  |  | -0.09333                              | 4.847   | No      | ns      |         |         |          |          |          |         |         |         |         |         |         |         |  |
| SP10 LD vs SP18 AI                        |        |  |  | 0.2462                                | 12.79   | Yes     | ***     |         |         |          |          |          |         |         |         |         |         |         |         |  |
| SP10 LD vs SP18 ED                        |        |  |  | 0.3092                                | 16.06   | Yes     | ***     |         |         |          |          |          |         |         |         |         |         |         |         |  |
| SP10 LD vs SP18 MD                        |        |  |  | 0.2964                                | 15.39   | Yes     | ***     |         |         |          |          |          |         |         |         |         |         |         |         |  |
| SP10 LD vs SP18 LD                        |        |  |  | 0.26                                  | 13.5    | Yes     | ***     |         |         |          |          |          |         |         |         |         |         |         |         |  |
| SP10 LD vs SP18 DD                        |        |  |  | 0.03637                               | 1.889   | No      | ns      |         |         |          |          |          |         |         |         |         |         |         |         |  |
| SP10 DD vs SP18 AI                        |        |  |  | 0.3396                                | 17.63   | Yes     | ***     |         |         |          |          |          |         |         |         |         |         |         |         |  |
| SP10 DD vs SP18 ED                        |        |  |  | 0.4025                                | 20.9    | Yes     | ***     |         |         |          |          |          |         |         |         |         |         |         |         |  |
| SP10 DD vs SP18 MD                        |        |  |  | 0.3897                                | 20.24   | Yes     | ***     |         |         |          |          |          |         |         |         |         |         |         |         |  |
| SP10 DD vs SP18 LD                        |        |  |  | 0.3533                                | 18.35   | Yes     | ***     |         |         |          |          |          |         |         |         |         |         |         |         |  |
| SP10 DD vs SP18 DD                        |        |  |  | 0.1297                                | 6.736   | Yes     | **      |         |         |          |          |          |         |         |         |         |         |         |         |  |
| SP18 AI vs SP18 ED                        |        |  |  | 0.06295                               | 3.298   | No      | ns      |         |         |          |          |          |         |         |         |         |         |         |         |  |
| SP18 AI vs SP18 MD                        |        |  |  | 0.0613                                | 2.603   | No      | ns      |         |         |          |          |          |         |         |         |         |         |         |         |  |
| SP18 AI vs SP18 LD                        |        |  |  | 0.01376                               | 0.748   | No      | ns      |         |         |          |          |          |         |         |         |         |         |         |         |  |
| SP18 AI vs SP18 DD                        |        |  |  | -0.2099                               | 10.9    | Yes     | ***     |         |         |          |          |          |         |         |         |         |         |         |         |  |
| SP18 ED vs SP18 MD                        |        |  |  | -0.0128                               | 0.6649  | No      | ns      |         |         |          |          |          |         |         |         |         |         |         |         |  |
| SP18 ED vs SP18 LD                        |        |  |  | -0.04917                              | 2.553   | No      | ns      |         |         |          |          |          |         |         |         |         |         |         |         |  |

| 1way ANOVA - Compare all pair: 2019DA |                |  |  | 1way ANOVA of Data-Column: 2019 DA |  |  |          |  |  |         |  |  |         |  |  |         |  |  |         |  |  |
|---------------------------------------|----------------|--|--|------------------------------------|--|--|----------|--|--|---------|--|--|---------|--|--|---------|--|--|---------|--|--|
| Parameter                             | Table Analyzed |  |  | Number of                          |  |  |          |  |  |         |  |  |         |  |  |         |  |  |         |  |  |
| One-way analysis of variance          | DA2019         |  |  | 3                                  |  |  | 3        |  |  | 3       |  |  | 3       |  |  | 3       |  |  | 3       |  |  |
| P value                               | < 0.0001       |  |  | Minimum                            |  |  | 0.9      |  |  | 0.86    |  |  | 0.86    |  |  | 0.76    |  |  | 0.78    |  |  |
| P value summary                       | ***            |  |  | 25% Percr                          |  |  | 0.9      |  |  | 0.86    |  |  | 0.86    |  |  | 0.76    |  |  | 0.78    |  |  |
| Are means signif. diff                | Yes            |  |  | Median                             |  |  | 0.91     |  |  | 0.89    |  |  | 0.89    |  |  | 0.82    |  |  | 0.79    |  |  |
| Number of groups                      | 15             |  |  | 75% Percr                          |  |  | 0.92     |  |  | 0.9     |  |  | 0.89    |  |  | 0.84    |  |  | 0.82    |  |  |
| F                                     | 37.62          |  |  | Maximum                            |  |  | 0.92     |  |  | 0.9     |  |  | 0.89    |  |  | 0.84    |  |  | 0.82    |  |  |
| R squared                             | 0.9461         |  |  | Mean                               |  |  | 0.91     |  |  | 0.8833  |  |  | 0.88    |  |  | 0.8067  |  |  | 0.7967  |  |  |
| ANOVA Table                           | SS             |  |  | Std. Deviat                        |  |  | 0.01     |  |  | 0.02082 |  |  | 0.01732 |  |  | 0.04163 |  |  | 0.02082 |  |  |
| Treatment (between                    | 0.7643         |  |  | Std. Error                         |  |  | 0.005774 |  |  | 0.01202 |  |  | 0.01    |  |  | 0.02404 |  |  | 0.01202 |  |  |
| Residual (within colu                 | 0.04353        |  |  | Lower 95%                          |  |  | 0.8852   |  |  | 0.8316  |  |  | 0.837   |  |  | 0.7032  |  |  | 0.745   |  |  |
| Total                                 | 0.8078         |  |  | Upper 95%                          |  |  | 0.9348   |  |  | 0.935   |  |  | 0.923   |  |  | 0.9101  |  |  | 0.8484  |  |  |

| Tukey's Multiple Comp | Mean Diff | q      | Significan | Summary | 95% CI of diff      |
|-----------------------|-----------|--------|------------|---------|---------------------|
| SP09 AI vs SP09 ED    | 0.02667   | 1.212  | No         | ns      | -0.08794 to 0.1413  |
| SP09 AI vs SP09 MD    | 0.03      | 1.364  | No         | ns      | -0.08461 to 0.1446  |
| SP09 AI vs SP09 LD    | 0.1033    | 4.698  | No         | ns      | -0.01127 to 0.2179  |
| SP09 AI vs SP09 DD    | 0.1133    | 5.153  | No         | ns      | -0.001274 to 0.2279 |
| SP09 AI vs SP17AI     | 0.07667   | 3.486  | No         | DA      | -0.03794 to 0.1913  |
| SP09 AI vs SP17 ED    | 0.2033    | 9.245  | Yes        | ***     | 0.08873 to 0.3179   |
| SP09 AI vs SP17 MD    | 0.1933    | 8.791  | Yes        | ***     | 0.07873 to 0.3079   |
| SP09 AI vs SP17 LD    | 0.2       | 9.094  | Yes        | ***     | 0.08539 to 0.3146   |
| SP09 AI vs SP17 DD    | 0.1867    | 8.487  | Yes        | ***     | 0.07206 to 0.3013   |
| SP09 AI vs SP23 AI    | 0.2367    | 10.76  | Yes        | ***     | 0.1221 to 0.3513    |
| SP09 AI vs SP23 ED    | 0.3933    | 17.88  | Yes        | ***     | 0.2787 to 0.5079    |
| SP09 AI vs SP23 MD    | 0.3133    | 14.25  | Yes        | ***     | 0.1987 to 0.4279    |
| SP09 AI vs SP23 LD    | 0.3433    | 15.61  | Yes        | ***     | 0.2287 to 0.4579    |
| SP09 AI vs SP23 DD    | 0.43      | 19.55  | Yes        | ***     | 0.3154 to 0.5446    |
| SP09 ED vs SP09 MD    | 0.003333  | 0.1516 | No         | ns      | -0.1113 to 0.1179   |
| SP09 ED vs SP09 LD    | 0.07667   | 3.486  | No         | ns      | -0.03794 to 0.1913  |
| SP09 ED vs SP09 DD    | 0.08667   | 3.941  | No         | ns      | -0.02794 to 0.2013  |
| SP09 ED vs SP17AI     | 0.05      | 2.273  | No         | ns      | -0.06461 to 0.1646  |
| SP09 ED vs SP17 ED    | 0.1767    | 8.033  | Yes        | ***     | 0.06206 to 0.2913   |
| SP09 ED vs SP17 MD    | 0.1667    | 7.578  | Yes        | ***     | 0.05206 to 0.2813   |
| SP09 ED vs SP17 LD    | 0.1733    | 7.881  | Yes        | ***     | 0.05873 to 0.2879   |
| SP09 ED vs SP17 DD    | 0.16      | 7.275  | Yes        | **      | 0.04539 to 0.2746   |
| SP09 ED vs SP23 AI    | 0.21      | 9.548  | Yes        | ***     | 0.09539 to 0.3246   |
| SP09 ED vs SP23 ED    | 0.3667    | 16.67  | Yes        | ***     | 0.2521 to 0.4813    |
| SP09 ED vs SP23 MD    | 0.2867    | 13.03  | Yes        | ***     | 0.1721 to 0.4013    |
| SP09 ED vs SP23 LD    | 0.3167    | 14.4   | Yes        | ***     | 0.2021 to 0.4313    |
| SP09 ED vs SP23 DD    | 0.4033    | 18.34  | Yes        | ***     | 0.2887 to 0.5179    |
| SP09 MD vs SP09 LD    | 0.07333   | 3.334  | No         | ns      | -0.04127 to 0.1879  |
| SP09 MD vs SP09 DD    | 0.08333   | 3.789  | No         | ns      | -0.03127 to 0.1979  |
| SP09 MD vs SP17AI     | 0.04667   | 2.122  | No         | ns      | -0.06794 to 0.1613  |
| SP09 MD vs SP17 ED    | 0.1733    | 7.881  | Yes        | ***     | 0.05873 to 0.2879   |
| SP09 MD vs SP17 MD    | 0.1633    | 7.427  | Yes        | ***     | 0.04873 to 0.2779   |
| SP09 MD vs SP17 LD    | 0.17      | 7.73   | Yes        | ***     | 0.05539 to 0.2846   |
| SP09 MD vs SP17 DD    | 0.1567    | 7.123  | Yes        | **      | 0.04206 to 0.2713   |
| SP09 MD vs SP23 AI    | 0.2067    | 9.397  | Yes        | ***     | 0.09206 to 0.3213   |
| SP09 MD vs SP23 ED    | 0.3633    | 16.52  | Yes        | ***     | 0.2487 to 0.4779    |
| SP09 MD vs SP23 MD    | 0.2833    | 12.88  | Yes        | ***     | 0.1687 to 0.3979    |
| SP09 MD vs SP23 LD    | 0.3133    | 14.25  | Yes        | ***     | 0.1987 to 0.4279    |
| SP09 MD vs SP23 DD    | 0.4       | 18.10  | Yes        | ***     | 0.2854 to 0.5146    |
| SP09 LD vs SP09 DD    | 0.01      | 0.4547 | No         | ns      | -0.1046 to 0.1246   |
| SP09 LD vs SP17AI     | -0.02667  | 1.212  | No         | ns      | -0.1413 to 0.08794  |
| SP09 LD vs SP17 ED    | 0.1       | 4.547  | No         | ns      | -0.01461 to 0.2146  |
| SP09 LD vs SP17 MD    | 0.09      | 4.092  | No         | ns      | -0.02461 to 0.2046  |
| SP09 LD vs SP17 LD    | 0.09667   | 4.395  | No         | ns      | -0.01794 to 0.2113  |
| SP09 LD vs SP17 DD    | 0.08333   | 3.789  | No         | ns      | -0.03127 to 0.1979  |
| SP09 LD vs SP23 AI    | 0.1333    | 6.062  | Yes        | *       | 0.01873 to 0.2479   |
| SP09 LD vs SP23 ED    | 0.29      | 13.19  | Yes        | ***     | 0.1754 to 0.4046    |
| SP09 LD vs SP23 MD    | 0.21      | 9.548  | Yes        | ***     | 0.09539 to 0.3246   |
| SP09 LD vs SP23 LD    | 0.24      | 10.91  | Yes        | ***     | 0.1254 to 0.3546    |
| SP09 LD vs SP23 DD    | 0.3267    | 14.85  | Yes        | ***     | 0.2121 to 0.4413    |
| SP09 DD vs SP17AI     | -0.03667  | 1.667  | No         | ns      | -0.1513 to 0.07794  |
| SP09 DD vs SP17 ED    | 0.09      | 4.092  | No         | ns      | -0.02461 to 0.2046  |
| SP09 DD vs SP17 MD    | 0.08      | 3.637  | No         | ns      | -0.03461 to 0.1946  |
| SP09 DD vs SP17 LD    | 0.08667   | 3.941  | No         | ns      | -0.02794 to 0.2013  |
| SP09 DD vs SP17 DD    | 0.07333   | 3.334  | No         | ns      | -0.04127 to 0.1879  |
| SP09 DD vs SP23 AI    | 0.1233    | 5.608  | Yes        | *       | 0.008726 to 0.2379  |
| SP09 DD vs SP23 ED    | 0.28      | 12.73  | Yes        | ***     | 0.1654 to 0.3946    |
| SP09 DD vs SP23 MD    | 0.2       | 9.094  | Yes        | ***     | 0.08539 to 0.3146   |
| SP09 DD vs SP23 LD    | 0.23      | 10.46  | Yes        | ***     | 0.1154 to 0.3446    |
| SP09 DD vs SP23 DD    | 0.3167    | 14.4   | Yes        | ***     | 0.2021 to 0.4313    |
| SP17AI vs SP17 ED     | 0.1267    | 5.759  | Yes        | *       | 0.01206 to 0.2413   |
| SP17AI vs SP17 MD     | 0.1167    | 5.305  | Yes        | *       | 0.002060 to 0.2313  |
| SP17AI vs SP17 LD     | 0.1233    | 5.608  | Yes        | *       | 0.008726 to 0.2379  |
| SP17AI vs SP17 DD     | 0.11      | 5.002  | No         | ns      | -0.004607 to 0.2246 |
| SP17AI vs SP23 AI     | 0.16      | 7.275  | Yes        | **      | 0.04539 to 0.2746   |
| SP17AI vs SP23 ED     | 0.3167    | 14.4   | Yes        | ***     | 0.2021 to 0.4313    |
| SP17AI vs SP23 MD     | 0.2367    | 10.76  | Yes        | ***     | 0.1221 to 0.3513    |
| SP17AI vs SP23 LD     | 0.2667    | 12.12  | Yes        | ***     | 0.1521 to 0.3813    |
| SP17AI vs SP23 DD     | 0.3533    | 16.07  | Yes        | ***     | 0.2387 to 0.4679    |
| SP17 ED vs SP17 MD    | -0.01     | 0.4547 | No         | ns      | -0.1246 to 0.1046   |
| SP17 ED vs SP17 LD    | -0.00333  | 0.1516 | No         | ns      | -0.1179 to 0.1113   |
| SP17 ED vs SP17 DD    | -0.01667  | 0.7578 | No         | ns      | -0.1313 to 0.09794  |
| SP17 ED vs SP23 AI    | 0.03333   | 1.516  | No         | ns      | -0.08127 to 0.1479  |
| SP17 ED vs SP23 ED    | 0.19      | 8.639  | Yes        | ***     | 0.07539 to 0.3046   |
| SP17 ED vs SP23 MD    | 0.11      | 5.002  | No         | ns      | -0.004607 to 0.2246 |
| SP17 ED vs SP23 LD    | 0.14      | 6.366  | Yes        | **      | 0.02539 to 0.2546   |
| SP17 ED vs SP23 DD    | 0.2267    | 10.31  | Yes        | ***     | 0.1121 to 0.3413    |
| SP17 MD vs SP17 LD    | 0.006667  | 0.3031 | No         | ns      | -0.1079 to 0.1213   |
| SP17 MD vs SP17 DD    | -0.00667  | 0.3031 | No         | ns      | -0.1213 to 0.1079   |
| SP17 MD vs SP23 AI    | 0.04333   | 1.97   | No         | ns      | -0.07127 to 0.1579  |
| SP17 MD vs SP23 ED    | 0.2       | 9.094  | Yes        | ***     | 0.08539 to 0.3146   |
| SP17 MD vs SP23 MD    | 0.12      | 5.456  | Yes        | *       | 0.005393 to 0.2346  |
| SP17 MD vs SP23 LD    | 0.15      | 6.82   | Yes        | **      | 0.03539 to 0.2646   |
| SP17 MD vs SP23 DD    | 0.2367    | 10.76  | Yes        | ***     | 0.1221 to 0.3513    |
| SP17 LD vs SP17 DD    | -0.01333  | 0.6062 | No         | ns      | -0.1279 to 0.1013   |
| SP17 LD vs SP23 AI    | 0.03667   | 1.667  | No         | ns      | -0.07794 to 0.1513  |
| SP17 LD vs SP23 ED    | 0.1933    | 8.791  | Yes        | ***     | 0.07873 to 0.3079   |
| SP17 LD vs SP23 MD    | 0.1133    | 5.153  | No         | ns      | -0.001274 to 0.2279 |
| SP17 LD vs SP23 LD    | 0.1433    | 6.517  | Yes        | **      | 0.02873 to 0.2579   |
| SP17 LD vs SP23 DD    | 0.23      | 10.46  | Yes        | ***     | 0.1154 to 0.3446    |
| SP17 DD vs SP23 AI    | 0.05      | 2.273  | No         | ns      | -0.06461 to 0.1646  |
| SP17 DD vs SP23 ED    | 0.2067    | 9.397  | Yes        | ***     | 0.09206 to 0.3213   |
| SP17 DD vs SP23 MD    | 0.1067    | 5.759  | Yes        | *       | 0.01206 to 0.2413   |
| SP17 DD vs SP23 LD    | 0.1567    | 7.123  | Yes        | **      | 0.04206 to 0.2713   |
| SP17 DD vs SP23 DD    | 0.2433    | 11.06  | Yes        | ***     | 0.1287 to 0.3579    |
| SP23 AI vs SP23 ED    | 0.1567    | 7.123  | Yes        | **      | 0.04206 to 0.2713   |
| SP23 AI vs SP23 MD    | 0.07667   | 3.486  | No         | ns      | -0.03794 to 0.1913  |
| SP23 AI vs SP23 LD    | 0.1067    | 4.85   | No         | ns      | -0.007940 to 0.2213 |
| SP23 AI vs SP23 DD    | 0.1933    | 8.791  | Yes        | ***     | 0.07873 to 0.3079   |
| SP23 ED vs SP23 MD    | -0.08     | 3.637  | No         | ns      | -0.1946 to 0.03461  |
| SP23 ED vs SP23 LD    | -0.05     | 2.273  | No         | ns      | -0.1646 to 0.06461  |
| SP23 ED vs SP23 DD    | 0.03667   | 1.667  | No         | ns      | -0.07794 to 0.1513  |
| SP23 MD vs SP23 LD    | 0.03      | 1.364  | No         | ns      | -0.08461 to 0.1446  |
| SP23 MD vs SP23 DD    | 0.1167    | 5.305  | Yes        | *       | 0.002060 to 0.2313  |
| SP23 LD vs SP23 DD    | 0.08667   | 3.941  | No         | ns      | -0.02794 to 0.2013  |

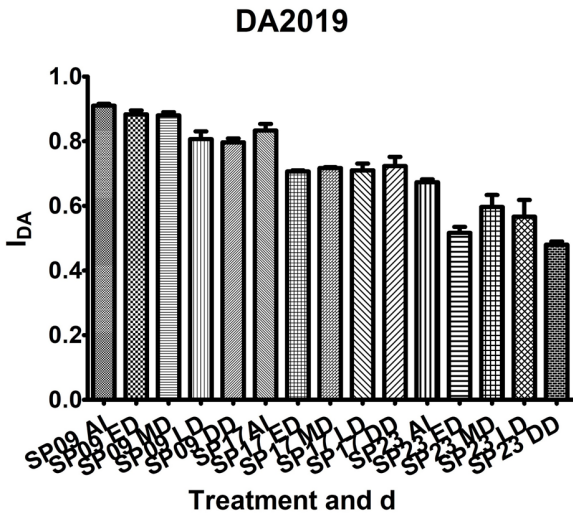



|                              |        |    |        |             |        |         |         |        |         |         |        |        |        |        |        |        |         |        |        |
|------------------------------|--------|----|--------|-------------|--------|---------|---------|--------|---------|---------|--------|--------|--------|--------|--------|--------|---------|--------|--------|
| Parameter                    |        |    |        | Number of   | 3      | 3       | 3       | 3      | 3       | 3       | 3      | 3      | 3      | 3      | 3      | 3      | 3       | 3      | 3      |
| Table Ana DMC19              |        |    |        |             |        |         |         |        |         |         |        |        |        |        |        |        |         |        |        |
| One-way analysis of variance |        |    |        | Minimum     | 11.72  | 15.64   | 13.25   | 11.72  | 13.26   | 11.67   | 14.36  | 12.46  | 11.15  | 12.92  | 12.42  | 15.29  | 13.97   | 13.21  | 14.79  |
| P value <0.0001              |        |    |        | 25% Pierce  | 11.72  | 15.64   | 13.25   | 11.72  | 13.26   | 11.67   | 14.36  | 12.46  | 11.15  | 12.92  | 12.42  | 15.29  | 13.97   | 13.21  | 14.79  |
| P value s ***                |        |    |        | Median      | 11.83  | 15.8    | 13.33   | 11.83  | 13.32   | 11.79   | 14.39  | 12.62  | 11.66  | 13.08  | 13.43  | 15.69  | 14.03   | 13.24  | 14.99  |
| Are mean/Yes                 |        |    |        | 75% Pierce  | 12.3   | 15.84   | 13.41   | 12.3   | 13.42   | 11.79   | 14.7   | 13.16  | 11.68  | 14.08  | 13.66  | 15.87  | 14.22   | 13.68  | 15.68  |
|                              |        |    |        | Maximum     | 12.3   | 15.84   | 13.41   | 12.3   | 13.42   | 11.79   | 14.7   | 13.16  | 11.68  | 14.08  | 13.66  | 15.87  | 14.22   | 13.68  | 15.68  |
| Number:                      | 15     |    |        |             |        |         |         |        |         |         |        |        |        |        |        |        |         |        |        |
| F                            | 49.54  |    |        | Mean        | 11.95  | 15.76   | 13.33   | 11.95  | 13.33   | 11.75   | 14.48  | 12.75  | 11.5   | 13.36  | 13.17  | 15.61  | 14.07   | 13.38  | 15.16  |
| RSquare                      | 0.9585 |    |        | Std. Deviat | 0.3076 | 0.1032  | 0.07815 | 0.3076 | 0.07897 | 0.0722  | 0.1884 | 0.3662 | 0.3033 | 0.6273 | 0.6604 | 0.2968 | 0.1306  | 0.2619 | 0.4668 |
|                              |        |    |        | Std. Error  | 0.1776 | 0.05957 | 0.04512 | 0.1776 | 0.04559 | 0.04168 | 0.1088 | 0.2115 | 0.1751 | 0.3622 | 0.3813 | 0.1714 | 0.07542 | 0.1512 | 0.2695 |
| ANOVA Te SS                  |        | df | MS     |             |        |         |         |        |         |         |        |        |        |        |        |        |         |        |        |
| Treatme                      | 78.63  | 14 | 5.616  | Lower 95%   | 11.19  | 15.51   | 13.14   | 11.19  | 13.14   | 11.57   | 14.01  | 11.84  | 10.74  | 11.8   | 11.53  | 14.88  | 13.75   | 12.73  | 14     |
| Residual                     | 3.401  | 30 | 0.1134 | Upper 95%   | 12.71  | 16.02   | 13.53   | 12.71  | 13.53   | 11.93   | 14.95  | 13.66  | 12.25  | 14.92  | 14.81  | 16.35  | 14.4    | 14.03  | 16.32  |
| Total                        | 82.03  | 44 |        |             |        |         |         |        |         |         |        |        |        |        |        |        |         |        |        |

Tukey's M Mean Diff q

Significan Summary

95% CI of diff

|           |          |         |     |     |                   |
|-----------|----------|---------|-----|-----|-------------------|
| D87-AI vs | -3.812   | 19.61   | Yes | *** | -4.224 to -2.799  |
| D87-AI vs | -1.382   | 7.11    | Yes | **  | -2.395 to -0.3692 |
| D87-AI vs | 0        | 0       | No  | ns  | -1.013 to 1.013   |
| D87-AI vs | -1.382   | 7.11    | Yes | **  | -2.395 to -0.3692 |
| D87-AI vs | 0.2004   | 1.031   | No  | ns  | -0.8125 to 1.213  |
| D87-AI vs | -2.533   | 13.03   | Yes | *** | -3.546 to -1.520  |
| D87-AI vs | -0.7995  | 4.113   | No  | ns  | -1.812 to 0.2135  |
| D87-AI vs | 0.4545   | 2.338   | No  | ns  | -0.584 to 1.467   |
| D87-AI vs | -1.407   | 7.238   | Yes | **  | -2.400 to -0.3941 |
| D87-AI vs | -1.218   | 6.266   | Yes | **  | -2.231 to -0.2050 |
| D87-AI vs | -3.664   | 18.85   | Yes | *** | -4.677 to -2.651  |
| D87-AI vs | -2.121   | 10.91   | Yes | *** | -3.134 to -1.108  |
| D87-AI vs | -1.426   | 7.337   | Yes | **  | -2.439 to -0.4134 |
| D87-AI vs | -3.206   | 16.49   | Yes | *** | -4.219 to -2.193  |
| D87-ED v  | 2.429    | 12.5    | Yes | *** | 1.416 to 3.442    |
| D87-ED v  | 3.812    | 19.61   | Yes | *** | 2.799 to 4.824    |
| D87-ED v  | 2.429    | 12.5    | Yes | *** | 1.416 to 3.442    |
| D87-ED v  | 4.012    | 20.64   | Yes | *** | 2.999 to 5.025    |
| D87-ED v  | 1.729    | 6.579   | Yes | **  | 0.7658 to 2.292   |
| D87-ED v  | 3.012    | 15.5    | Yes | *** | 1.999 to 4.025    |
| D87-ED v  | 4.266    | 21.95   | Yes | *** | 3.253 to 5.279    |
| D87-ED v  | 2.405    | 12.37   | Yes | *** | 1.392 to 3.417    |
| D87-ED v  | 2.594    | 13.34   | Yes | *** | 1.581 to 3.607    |
| D87-ED v  | 0.1478   | 0.7603  | No  | ns  | -0.8651 to 1.161  |
| D87-ED v  | 1.69     | 8.695   | Yes | *** | 0.6773 to 2.703   |
| D87-ED v  | 2.385    | 12.27   | Yes | *** | 1.372 to 3.398    |
| D87-ED v  | 0.6656   | 3.115   | No  | ns  | -0.4071 to 1.619  |
| D87-MD v  | 1.382    | 7.11    | Yes | **  | 0.3692 to 2.395   |
| D87-MD v  | 0        | 0       | No  | ns  | -1.013 to 1.013   |
| D87-MD v  | 1.583    | 8.142   | Yes | *** | 0.5697 to 2.596   |
| D87-MD v  | -1.151   | 5.919   | Yes | *   | -2.164 to -0.1377 |
| D87-MD v  | 0.5827   | 2.998   | No  | ns  | -0.4302 to 1.596  |
| D87-MD v  | 1.837    | 9.449   | Yes | *** | 0.8238 to 2.850   |
| D87-MD v  | -0.02483 | 0.1278  | No  | ns  | -1.038 to 0.9881  |
| D87-MD v  | 0.1642   | 0.8447  | No  | ns  | -0.8887 to 1.177  |
| D87-MD v  | -2.282   | 11.74   | Yes | *** | -3.295 to -1.269  |
| D87-MD v  | -0.7391  | 3.802   | No  | ns  | -1.752 to 0.2738  |
| D87-MD v  | -0.04413 | 0.227   | No  | ns  | -1.057 to 0.9688  |
| D87-MD v  | -1.824   | 9.382   | Yes | *** | -2.837 to -0.8108 |
| D87-ED v  | -1.382   | 7.11    | Yes | *** | -2.395 to -0.3692 |
| D87-ED v  | 0.2004   | 1.031   | No  | ns  | -0.8125 to 1.213  |
| D87-ED v  | -2.533   | 13.03   | Yes | *** | -3.546 to -1.520  |
| D87-ED v  | -0.7995  | 4.113   | No  | ns  | -1.812 to 0.2135  |
| D87-ED v  | 0.4545   | 2.338   | No  | ns  | -0.584 to 1.467   |
| D87-ED v  | -1.407   | 7.238   | Yes | **  | -2.400 to -0.3941 |
| D87-ED v  | -1.218   | 6.266   | Yes | **  | -2.231 to -0.2050 |
| D87-ED v  | -3.664   | 18.85   | Yes | *** | -4.677 to -2.651  |
| D87-ED v  | -2.121   | 10.91   | Yes | *** | -3.134 to -1.108  |
| D87-ED v  | -1.426   | 7.337   | Yes | **  | -2.439 to -0.4134 |
| D87-ED v  | -3.206   | 16.49   | Yes | *** | -4.219 to -2.193  |
| D87-DD v  | 1.583    | 8.142   | Yes | *** | 0.5697 to 2.596   |
| D87-DD v  | -1.151   | 5.919   | Yes | *   | -2.164 to -0.1377 |
| D87-DD v  | 0.5827   | 2.998   | No  | ns  | -0.4302 to 1.596  |
| D87-DD v  | 1.837    | 9.449   | Yes | *** | 0.8238 to 2.850   |
| D87-DD v  | -0.02483 | 0.1278  | No  | ns  | -1.038 to 0.9881  |
| D87-DD v  | 0.1642   | 0.8447  | No  | ns  | -0.8887 to 1.177  |
| D87-DD v  | -2.282   | 11.74   | Yes | *** | -3.295 to -1.269  |
| D87-DD v  | -0.7391  | 3.802   | No  | ns  | -1.752 to 0.2738  |
| D87-DD v  | -0.04413 | 0.227   | No  | ns  | -1.057 to 0.9688  |
| D87-DD v  | -1.824   | 9.382   | Yes | *** | -2.837 to -0.8108 |
| D15-AI v  | -2.733   | 14.06   | Yes | *** | -3.746 to -1.720  |
| D15-AI v  | -0.9999  | 5.144   | No  | ns  | -2.013 to 0.01304 |
| D15-AI v  | 0.2541   | 1.307   | No  | ns  | -0.7588 to 1.267  |
| D15-AI v  | -1.607   | 8.269   | Yes | *** | -2.620 to -0.5945 |
| D15-AI v  | -1.418   | 7.297   | Yes | **  | -2.431 to -0.4055 |
| D15-AI v  | -3.864   | 19.88   | Yes | *** | -4.877 to -2.851  |
| D15-AI v  | -2.322   | 11.94   | Yes | *** | -3.335 to -1.309  |
| D15-AI v  | -1.627   | 8.369   | Yes | *** | -2.640 to -0.6138 |
| D15-AI v  | -3.406   | 17.52   | Yes | *** | -4.419 to -2.393  |
| D15-ED    | 1.733    | 8.917   | Yes | *** | 0.7204 to 2.746   |
| D15-ED    | 2.987    | 15.37   | Yes | *** | 1.974 to 4.000    |
| D15-ED    | 1.126    | 5.791   | Yes | *   | 0.1128 to 2.139   |
| D15-ED    | 1.315    | 6.764   | Yes | **  | 0.3019 to 2.328   |
| D15-ED    | -1.131   | 5.818   | Yes | *   | -2.144 to -0.1180 |
| D15-ED    | 0.4115   | 2.117   | No  | ns  | -0.6014 to 1.424  |
| D15-ED    | 1.106    | 5.692   | Yes | *   | 0.09352 to 2.119  |
| D15-ED    | -0.6732  | 3.463   | No  | ns  | -1.686 to 0.3398  |
| D15-MD    | 1.254    | 6.451   | Yes | **  | 0.2411 to 2.267   |
| D15-MD    | -0.6075  | 3.125   | No  | ns  | -1.620 to 0.4054  |
| D15-MD    | -0.4085  | 2.153   | No  | ns  | -1.431 to 0.5994  |
| D15-MD    | -3.864   | 14.73   | Yes | *** | -4.877 to -2.851  |
| D15-MD    | -1.322   | 6.8     | Yes | **  | -2.335 to -0.3089 |
| D15-MD    | -0.6268  | 3.225   | No  | ns  | -1.640 to 0.3861  |
| D15-MD    | -2.406   | 12.38   | Yes | *** | -3.419 to -1.394  |
| D15-LD    | -1.862   | 9.576   | Yes | *** | -2.874 to -0.8486 |
| D15-LD    | -1.673   | 8.604   | Yes | *** | -2.685 to -0.6596 |
| D15-LD    | -4.118   | 21.19   | Yes | *** | -5.131 to -3.105  |
| D15-LD    | -2.576   | 13.25   | Yes | *** | -3.589 to -1.563  |
| D15-LD    | -1.881   | 9.676   | Yes | *** | -2.894 to -0.8679 |
| D15-LD    | -3.66    | 18.83   | Yes | *** | -4.673 to -2.648  |
| D15-DD    | 0.189    | 0.9725  | No  | ns  | -0.8239 to 1.202  |
| D15-DD    | -2.257   | 11.61   | Yes | *** | -3.270 to -1.244  |
| D15-DD    | -0.7043  | 3.674   | No  | ns  | -1.727 to 0.2987  |
| D15-DD    | -0.0193  | 0.09928 | No  | ns  | -1.032 to 0.9936  |
| D15-DD    | -1.799   | 9.254   | Yes | *** | -2.812 to -0.7860 |
| D136-AI v | -2.446   | 12.58   | Yes | *** | -3.459 to -1.433  |
| D136-AI v | -0.9033  | 4.647   | No  | ns  | -1.916 to 0.1096  |
| D136-AI v | -0.2083  | 1.072   | No  | ns  | -1.221 to 0.8046  |
| D136-AI v | -1.988   | 10.23   | Yes | *** | -3.001 to -0.9750 |
| D136-ED   | 1.542    | 7.935   | Yes | *** | 0.5295 to 2.555   |
| D136-ED   | 2.237    | 11.51   | Yes | *** | 1.224 to 3.250    |
| D136-ED   | 0.4578   | 2.355   | No  | ns  | -0.5551 to 1.471  |
| D136-MD   | 0.695    | 3.575   | No  | ns  | -0.3180 to 1.708  |
| D136-MD   | -1.085   | 5.58    | Yes | *   | -2.098 to -0.0712 |
| D136-LD   | -1.78    | 9.155   | Yes | *** | -2.793 to -0.7667 |

## DMC19

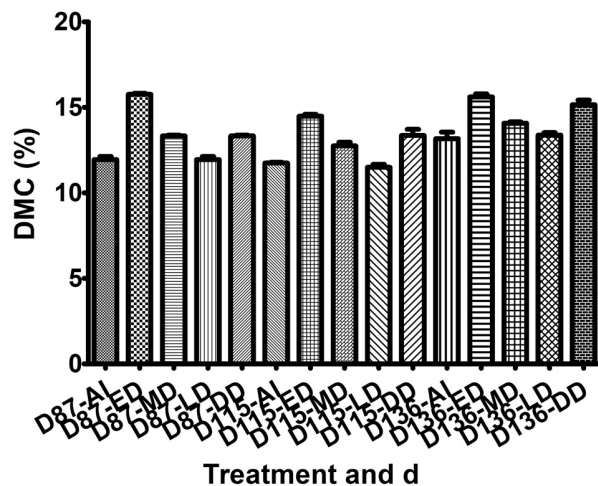

Supplement: s1 [file s1]
